# The Great Migration and African-American genomic diversity

Soheil Baharian<sup>1,3</sup>, Maxime Barakatt<sup>2,3</sup>, Christopher R. Gignoux<sup>4</sup>,  
Suyash Shringarpure<sup>4</sup>, Jacob Errington<sup>1,3</sup>, William J. Blot<sup>5,11</sup>,  
Carlos D. Bustamante<sup>4</sup>, Eimear E. Kenny<sup>6,7,8,9</sup>, Scott M. Williams<sup>10</sup>,  
Melinda C. Aldrich<sup>5,12</sup>, Simon Gravel<sup>1,3\*</sup>

<sup>1</sup>Department of Human Genetics, McGill University, Montreal, QC, Canada

<sup>2</sup>School of Computer Science, McGill University, Montreal, QC, Canada

<sup>3</sup>McGill University and Genome Quebec Innovation Centre, Montreal, QC, Canada

<sup>4</sup>Department of Genetics, Stanford University School of Medicine,  
Stanford, CA, USA

<sup>5</sup>Division of Epidemiology, Vanderbilt University School of Medicine,  
Nashville, TN, USA

<sup>6</sup>Department of Genetics and Genomic Sciences, The Icahn School of  
Medicine at Mount Sinai, New York, NY, USA

<sup>7</sup>The Charles Bronfman Institute for Personalized Medicine, The Icahn School of  
Medicine at Mount Sinai, New York, NY, USA

<sup>8</sup>The Icahn Institute for Genomics and Multiscale Biology, The Icahn School of  
Medicine at Mount Sinai, New York, NY, USA

<sup>9</sup>The Center for Statistical Genetics, The Icahn School of  
Medicine at Mount Sinai, New York, NY, USA

<sup>10</sup>Department of Genetics, Institute for Quantitative Biomedical Sciences,  
Dartmouth College, Hanover, NH, USA

<sup>11</sup>International Epidemiology Institute, Rockville, MD, USA

<sup>12</sup>Department of Thoracic Surgery, Vanderbilt University School of Medicine,  
Nashville, TN, USA

\*To whom correspondence should be addressed; E-mail: [simon.gravel@mcgill.ca](mailto:simon.gravel@mcgill.ca).

**Genetic studies of African-Americans identify functional variants, elucidate historical and genealogical mysteries, and reveal basic biology. However, African-Americans have been under-represented in genetic studies, and little is known about nation-wide patterns of genomic diversity in the population. Here, we present a comprehensive assessment of African-American genomic diversity using genotype data from nationally and regionally representative cohorts. We find higher African ancestry in southern United States compared to the North and West. We show that relatedness patterns track north- and west-bound routes followed during the Great Migration, suggesting that admixture occurred predominantly in the South prior to the Civil War and that ancestry-biased migration is responsible for regional differences in ancestry. Rare genetic traits among African-Americans can therefore be shared over long geographic distances along the Great Migration routes, yet their distribution over short distances remains highly structured. This study clarifies the role of recent demography in shaping African-American genomic diversity.**

## 1 **Introduction**

2 The history of African-American populations is marked by dramatic migrations within Africa,  
3 through the transatlantic slave trade, and within the United States (US). By 1808, when the  
4 transatlantic slave trade was made illegal in the US, approximately 360,000 Africans had been  
5 brought forcibly into the US in documented voyages (1). International and domestic slave trade  
6 continued to impose long-distance migration on enslaved African-Americans until the end of  
7 the Civil War, in 1865. By 1870, the US census reported 4.88 million “colored” individuals of  
8 which 90% lived in the South (2).

9 Despite the ban on slavery, economic and social perspectives for most African-Americans

10 remained bleak. Better opportunities in the North (Northeast and Midwest) and West led  
11 millions of African-Americans to leave the South between 1910 and 1970 (3). This demo-  
12 graphic event known as the Great Migration profoundly reshaped African-American communi-  
13 ties across the US (4). Today, 45 million Americans identify as Black or African-American.

14 A history of slavery and of systemic discrimination led to increased social, economic, and  
15 health burdens in many African-American communities. Health disparities continue to be com-  
16 pounded by poverty, unequal access to care, and unequal representation in medical research. To  
17 reduce health disparity in research, many cohorts are currently being assembled to encompass  
18 more of the diversity within the US (5, 6). These cohorts create opportunities in both medical  
19 and population genetics; they also require an understanding of genetic diversity within diverse  
20 cohorts. However, the large-scale migrations and incomplete genealogical records for African-  
21 Americans present a challenge for such an understanding. Previous studies have described the  
22 proportions of African, European, and Native American ancestries across individuals (7–13),  
23 the amount of diversity in sequence data (9, 14, 15) and inferred admixture models (12, 16, 17).  
24 However, the genetic population structure among African-Americans is not well understood.

25 Here, we use cohorts including 3,726 African-Americans and a total of 13,199 individu-  
26 als geographically distributed across the contiguous US to investigate nation-wide population  
27 structure among African-Americans. We first confirm and refine previous estimates of admix-  
28 ture proportions and timing in the population, and find significant differences in ancestry pro-  
29 portions between US regions. We then investigate relatedness among African-Americans and  
30 European-Americans through identity-by-descent analysis, and identify long- and short-range  
31 patterns of isolation-by-distance. We introduce quantitative models, incorporating both census  
32 data and fine-scale migration, to describe these isolation-by-distance patterns and infer mi-  
33 gratory patterns in the population. Integrating quantitative models for admixture, relatedness  
34 information, and historical data, we identify ancestry-biased migrations during the Great Mi-

35 gration as a driving force for ancestry and relatedness variation among African-Americans. The  
36 analysis of geographically distributed cohorts through detailed mathematical modeling there-  
37 fore helps us understand the distribution of genetic diversity in large cohorts and provides new  
38 insights into recent human demography.

## 39 Cohorts

40 We analyzed data from three cohorts: (a) Health and Retirement Study (HRS), with 1,501  
41 African-Americans and 9,308 European-Americans sampled representatively across all US states,  
42 and including urban and rural regions; (b) Southern Community Cohort Study (SCCS), in-  
43 cluding 2,128 African-Americans sampled within the southern US in rural locations; (c) 1000  
44 Genomes Project cohort of 97 individuals of African ancestry from the southwest USA (ASW).  
45 (For detailed information, see Methods and Tables S4 and S5.)

## 46 Admixture patterns

47 Individual genomes carry genetic material from multiple ancestral lineages, and each diploid  
48 locus derives ancestry from two distinct lineages. We used RFMix (11) together with 1000  
49 Genomes panels from Africa, Europe, and Asia to identify the most likely continental location  
50 of the pre-1492 ancestors that contributed genetic material at each locus for individuals in the  
51 cohorts (Fig. 1D, Fig. S14, and Methods). The overall proportion of African ancestry (Table  
52 1) is substantially higher in the SCCS and HRS than in the ASW and the recently published

| Cohort | % African | % European | % Native American |
|--------|-----------|------------|-------------------|
| SCCS   | 84.1      | 14.7       | 1.1               |
| HRS    | 82.1      | 16.7       | 1.2               |
| ASW    | 75.9      | 21.3       | 2.8               |

Table 1: Inferred proportions of African, European, and Native American/Asian Ancestry in three African-American cohorts.



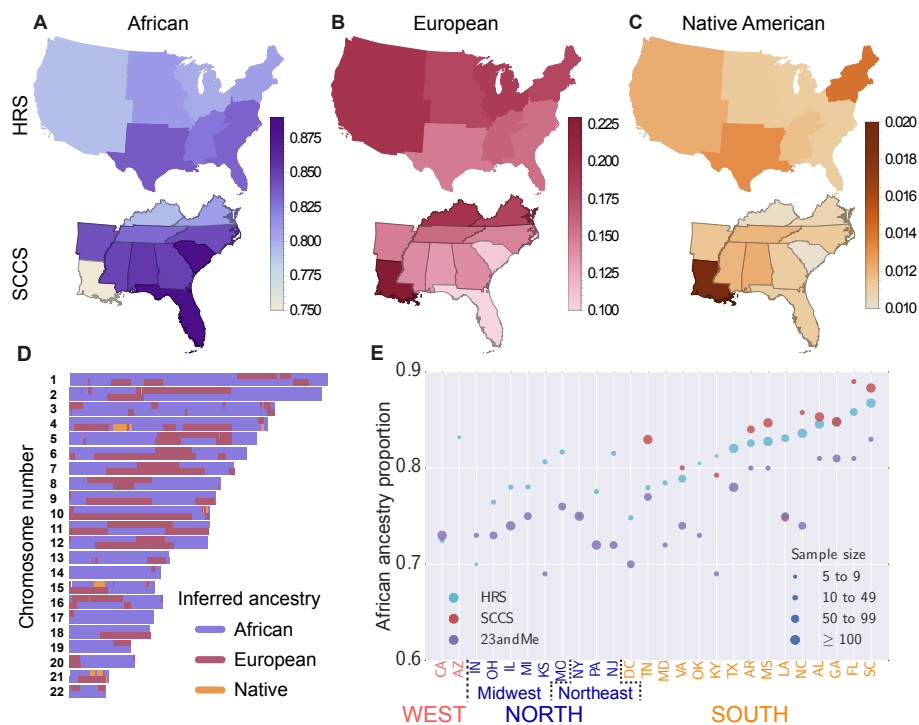

Figure 1: Inferred regional ancestry proportions for the HRS and SCCS cohorts: (A) African, (B) European, and (C) Native American ancestries. (D) Local ancestry assignment along the autosomes for an African-American individual from HRS. (E) Comparison of the African ancestry proportions in the HRS, SCCS, and 23andMe stratified by state. 23andMe proportions are from Ref. (12) and are reported for ease of comparison.

53 23andMe cohort (12).

54 The HRS cohort can be thought of as representative of the entire African-American popu-  
 55 lation, while the SCCS focuses primarily on individuals attending community health centers in  
 56 rural, underserved locations in the South. The sampling for the ASW and 23andMe did not aim  
 57 for specific representativeness (see Methods). In the HRS, average African ancestry proportion  
 58 is 83% in the South and lower in the North (80%, bootstrap  $p = 6 \times 10^{-6}$ ) and West (79%,  
 59  $p = 10^{-4}$ ) (Fig. 1). Within the SCCS, African ancestry proportion is highest in Florida (89%)  
 60 and South Carolina (88%) and lowest in Louisiana (75%) with all three significantly different  
 61 from the mean (Florida  $p = 0.006$ , South Carolina  $p = 4 \times 10^{-4}$ , and Louisiana  $p < 10^{-5}$ ;

62 bootstrap). The elevated African ancestry proportion in Florida and South Carolina is also ob-  
63 served in the HRS and in the 23andMe study (12), but Louisiana is more variable across cohorts  
64 (Fig. 1E). As expected, European ancestry proportions largely complement those of African  
65 ancestry across the US.

66 Recombination breaks down ancestral haplotypes over time (Fig. 1D). We inferred the tim-  
67 ing of admixture based on the length of continuous ancestry segments along individual genomes  
68 using TRACTS (16). Since there are few real Native American segments, even a small number  
69 of spurious Native American segments can bias the inference. Thus, we first considered a model  
70 with two source populations: African and non-African. Assuming a single admixture event, we  
71 estimated the time of admixture onset  $g$ , where  $g = 1$  means that the parents of the individual  
72 are the founders of the admixed population and that the current individual represents the first  
73 admixed generation. For HRS, we inferred a timing of  $g = 5.8$  generations ago (Fig. S9; con-  
74 fidence interval (CI) in Table S3). The estimated year of birth of the first admixed children is  
75  $T = T_s - (g - 1)\tau$ , where  $T_s = 1939.8$  is the average year of birth of HRS individuals and  $\tau$  is  
76 the generation time. Individuals born  $\tau$  years earlier should be 1 generation closer to the onset  
77 of admixture. Correlating birth year and inferred admixture time within our cohort (Fig. 2D),  
78 we inferred  $\tau = 27.4$  ( $r^2 = 0.88$ ,  $p = 10^{-7}$ ), which leads to an admixture year of 1808.

79 A model allowing for two phases of European admixture outperforms the single-pulse model  
80 for HRS and SCCS (see Methods). In HRS, it suggests a first admixture event in 1740 (8.3  
81 generations ago) and a second pulse, of approximately equal size, in 1863 (3.8 generations ago)  
82 (Fig. S9 and Methods). Mean birth year in SCCS is  $T_s = 1946.9$ , supporting a single admixture  
83 event in 1802 (6.3 generations ago), or two events in 1714 and 1854 (9.5 and 4.4 generations  
84 ago) (Fig. 2A, Fig. S9, and Methods). The two-pulse model is a coarse simplification of the  
85 historical admixture process, but the data strongly supports ongoing admixture, predominantly  
86 before or around the end of the Civil War. The limited role of early 20th century admixture

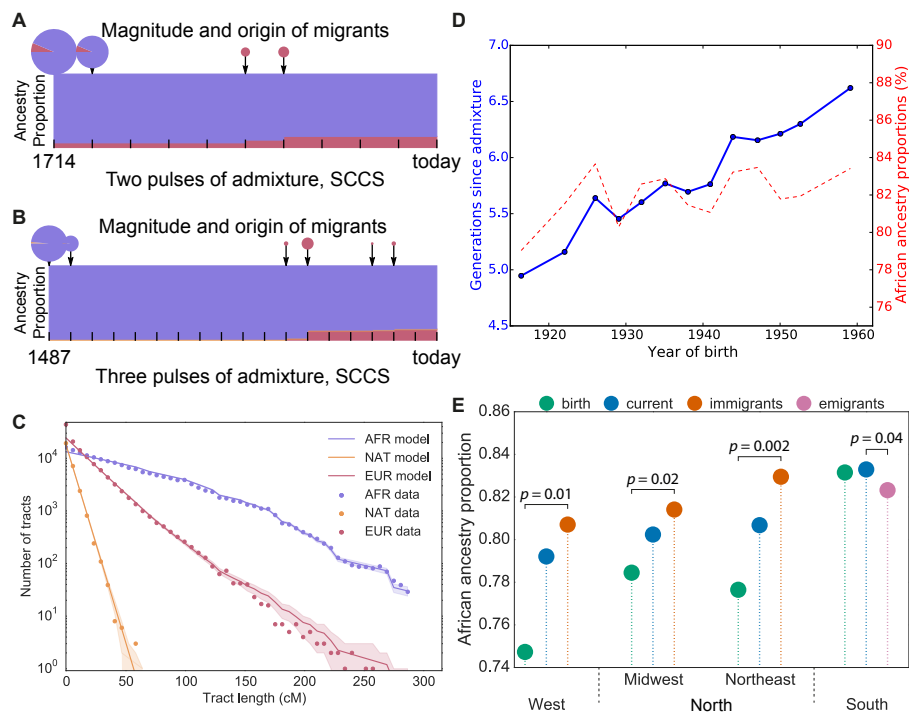

Figure 2: Admixture times and proportions of ancestral populations for SCCS in (A) the model with two pulses of admixture and (B) the model with three pulses of admixture. (C) Distribution of continuous ancestry tract lengths (dots) compared with predictions from the best-fit model (lines) Points in the shaded area are within one standard deviation of the predicted result. (D) Inferred time to admixture and African ancestry proportions as functions of birth year in HRS African-Americans. (E) Proportions of African ancestry in African-Americans within the North, South, and West using region of birth, region of residence, and migration status; bootstrap  $p$ -values are calculated between disjoint sets of individuals.

87 is further supported by the similarity in the inferred single-pulse time to admixture in all HRS  
 88 census regions (between 5.4 and 6.2 generations ago, Fig. S18) and all cohorts, which is easily  
 89 explained if most admixture occurred in the South prior to the Great Migration. The similar  
 90 levels of African ancestry for all age cohorts also supports limited European admixture between  
 91 1930 and 1960 (Fig. 2D). Importantly, more recent admixture is not represented in the SCCS  
 92 and HRS cohorts; only two participants were born after 1970.

93 Time estimates point to admixture occurring when most ancestors to present-day African-  
 94 Americans lived in the South. Regional differences in ancestry are therefore unlikely to be

95 caused by differences in recent admixture rates, and the large influx of migrants from the South  
96 would have strongly attenuated any earlier differences. An alternate explanation for regional  
97 differences in ancestry proportions is ancestry-biased migrations, if individuals with higher Eu-  
98 ropean ancestry were more likely to migrate to the North and West during the Great Migration.  
99 To validate the ancestry-biased migration model, we compared ancestry proportions of HRS  
100 individuals according to their region of birth, residence, and migration status.

101 European ancestry proportions in African-americans who left the South (16.5%) is elevated  
102 compared to individuals who remained in the South (15.3%, bootstrap  $p = 0.04$ ), confirming  
103 that ancestry-biased migrations continued at least to the mid-20th century. These migrants  
104 had substantially *less* European ancestry than people already established in the North (20.9%)  
105 and West (25.0%) (Fig. 2E). Since the latter two groups received large contributions from the  
106 first generation of migrants, the excess European ancestry suggests a stronger ancestry bias in  
107 the first wave of migration. This change over time in ancestry-biased migration is consistent  
108 with historical accounts that southern African-American migrants to northern cities during the  
109 later stages of the Great Migration had darker complexion than North-born African-Americans  
110 (see (18), p. 179). The change could be explained by better social opportunities available to  
111 individuals with higher levels of European ancestry: Individuals with wealth and education  
112 were much more likely to migrate in the first wave of the migration (see (18), p. 167). Despite  
113 the ongoing ancestry bias, the migrations of HRS participants led to more uniform ancestry  
114 proportions across regions. Interestingly, the proportion of African ancestry among African-  
115 Americans *increased* in all four US regions; the ancestry bias caused migrants to have levels of  
116 admixture between those of the South-born and North-born individuals. Their departures and  
117 arrivals both increased the regional African ancestry proportions.

118 Out of 1,491 non-Hispanic African-Americans in HRS, 11 individuals have more than 5%  
119 Native American ancestry. Within SCCS, this proportion is only 8 out of 2,128 individuals.

120 The ASW cohort, with 8 out of 97 individuals above this threshold, is a clear outlier; however,  
121 the other 89 individuals have similar amounts of Native American ancestry to the other studies:  
122 If we filter out individuals contributing more than 5% Native American ancestry from each  
123 cohort, the proportion of Native American ancestry in the remaining individuals is close to  
124 1.1% in the SCCS, in all HRS census regions, and in the ASW. The filtered SCCS Louisianans  
125 have significantly more Native American ancestry (1.6%, bootstrap  $p = 2 \times 10^{-5}$ ), and South  
126 Carolinians have less (0.09%,  $p = 2 \times 10^{-5}$ ). We did not find a global correlation between  
127 European and Native American ancestry, except within Louisiana (Fig. S7).

128 A three-population admixture model accounting for Native American admixture confirmed  
129 the continuous, relatively early European admixture, and suggested that Native American ad-  
130 mixture occurred earlier, consistent with previous findings of (12). Inferred dates of admixture  
131 are 1487 for the SCCS (Figs. 2B and 2C) and 1496 for the HRS (Figs. S10 and S11), as de-  
132 scribed in Methods. We suspect presence of a small amount of spurious, short segments of  
133 inferred Native American ancestry could bias the inference toward these unrealistically early  
134 dates. The lack of longer Native American segments nevertheless suggests that most Native  
135 American ancestry in African-Americans results from contact in the early days of slavery (see,  
136 e.g., (19)).

137 Along the X chromosome in the HRS, we estimate 84.82% African ancestry, 12.89% Eu-  
138 ropean ancestry, and 2.29% Native American ancestry (bootstrap 95% CI [2.14%, 2.45%]).  
139 The higher proportion of African ancestry along the X compared to autosomes is consistent  
140 with previous studies and the historical records of admixture occurring predominantly through  
141 European-American males admixing with African-American females (17). A model with a  
142 single pulse of admixture (as considered in (12)) applied to the present data suggests 28.6%  
143 Europeans among male contributors, but only 5.2% among female contributors. By contrast, it  
144 suggests almost no contribution from Native American males, and 3% from Native American

145 females.

146 The US Census includes a separate category for Hispanic/non-Hispanic ethnicity. In HRS,  
147 32 African-Americans have self-identified as Hispanics (of which only 10 are within the con-  
148 tiguous US). Genetic ancestry within this group is distinct from the bulk of the non-Hispanic  
149 African-American population in at least two ways: elevated Native American ancestry and a  
150 higher genetic similarity to southern European populations (Figs. S16 and S17). The correla-  
151 tion between southern European and Native American ancestries also holds in individuals who  
152 do not self-identify as Hispanic, particularly in Louisiana (see Methods). Individuals with ele-  
153 vated Native American and southern European ancestry would not be identified by self-reported  
154 ethnicity or by genetic estimates of African/non-African ancestry, yet they may have distinct re-  
155 sponse patterns to medical tests (20, 21).

## 156 **Identity by descent**

157 The classical isolation-by-distance model predicts that genetic relatedness between individuals  
158 decreases as their geographic distance increases (22). However, large-scale migrations can  
159 dramatically alter this picture (23). To investigate the effect of recent migrations on patterns of  
160 genetic relatedness within African-Americans, we consider genetic segments that are identical-  
161 by-descent (IBD) between pairs of individuals. Long IBD segments ( $l \geq 18$  cM) correspond to  
162 an expected common ancestor living within the last 8 generations and are informative of very  
163 recent demography (see Methods).

164 Figures 3A-B and S20-S23 show the mean pairwise relatedness among seven geographic  
165 regions in the US for African-Americans and European-Americans. Here, the relatedness of  
166 two individuals is defined as the proportion of their genomes shared through long IBD segments.  
167 These recent relatedness patterns differ markedly between African- and European-Americans:  
168 African-Americans show a distinct enrichment in South-to-North relatedness along the main

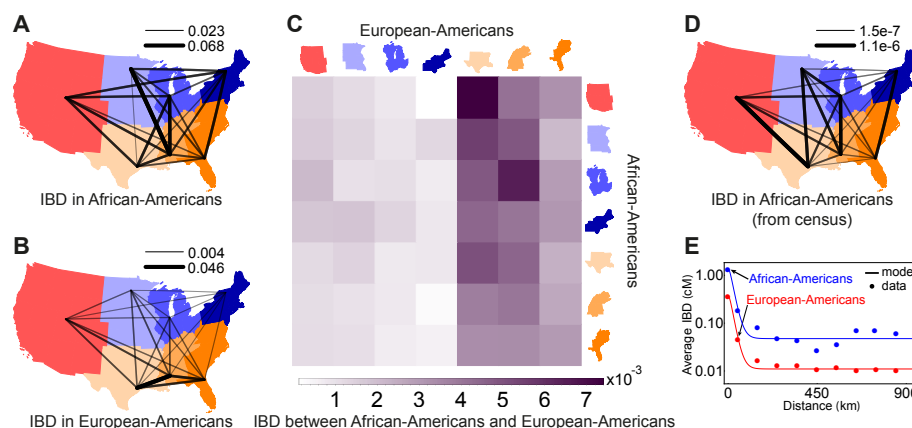

Figure 3: Pairwise genetic relatedness across US census regions among (A) African-Americans, (B) European-Americans, and (C) African-Americans and European-Americans. (D) Census-based prediction for African-Americans (see Methods). On each map, the thickness and opacity of a line connecting any two geographic regions show the relative strength of relatedness between those regions. Relatedness between regions with fewer than 10,000 possible pairs of individuals is not shown (see Methods for details). All numbers are in units of cM. (E) Decay of average IBD (shown in logarithmic scale) as a function of distance using IBD segments of length 18 cM or larger from HRS (dots), compared to the analytical model (lines).

169 historical migration routes.

170 To compare these relatedness patterns with recent migration data, we used the 20th cen-  
 171 tury US census data and a simple coalescent model to estimate the expected relatedness be-  
 172 tween geographic regions (see Methods). Census-based predictions (Fig. 3D) are correlated  
 173 with IBD-based observations (Fig. 3A) if we consider non-identical pairs of regions (Mantel  
 174 test  $p = 0.019$ ). Limiting the comparison to the South-to-North and South-to-West relatedness,  
 175 to capture migration routes specific to the Great Migration, yields  $p = 0.063$  (using the 2010  
 176 region of residence) and  $p = 0.015$  (using place of birth) (see Methods).

177 Figures 3C and S24 show the relatedness between African-Americans and European-Americans.  
 178 African-Americans across the US are more related to European-Americans from the South than  
 179 to those from the North or West. In addition, European-Americans from the South tend to be  
 180 more related to African-Americans in the North than to those in the South. This increased re-

181 latedness with increased distance is unusual in population genetics, but is easily explained: The  
182 ancestry-biased migration is also a relatedness-biased migration. The reduced relatedness be-  
183 tween northern European-Americans and African-Americans may also be reinforced by recent  
184 European migration, because the new migrants were more likely to settle in the North but were  
185 less likely to be related to African-Americans.

## 186 **Fine-scale isolation by distance**

187 Despite the unusual long-range relatedness patterns, identity-by-descent decays with distance  
188 within African-American communities in the South, reflecting isolation-by-distance (Fig. S5).  
189 To understand how migrations affect isolation-by-distance and identity-by-descent, we intro-  
190 duce a novel, simple model taking into account a diploid population density  $n$  and spatial diffu-  
191 sion constant  $D$ . In short, the displacement between parental birthplace and offspring birthplace  
192 of individuals is modeled as an isotropic random walk; the distribution of the times  $t$  to the most  
193 recent common ancestor of two individuals separated by distance  $R$  is calculated under a coa-  
194 lescent model; and the amount of genetic material shared IBD given a common ancestor at time  
195  $t$  is computed as in (24). In this model, the expected fraction of genome shared IBD, through  
196 segments of length in  $\ell = [l_{\min}, l_{\max}]$  (in Morgans), between two randomly chosen individuals  
197 separated by  $R$  has the simple form

$$E_{\ell}[f|R] = \frac{1}{16\pi nD} \left\{ 2 \left[ K_0 \left( \frac{R}{r_{\min}} \right) - K_0 \left( \frac{R}{r_{\max}} \right) \right] + \left[ \frac{R}{r_{\min}} K_1 \left( \frac{R}{r_{\min}} \right) - \frac{R}{r_{\max}} K_1 \left( \frac{R}{r_{\max}} \right) \right] \right\}, \quad (1)$$

198 where  $r_{\min, \max} = \sqrt{D/l_{\min, \max}}$ , and  $K_{\alpha}(x)$  is the modified Bessel function of the second kind  
199 (see Methods).

200 Using IBD segments longer than 18 cM, we estimate population density  $n_{\text{AFR}} = 1.9 \text{ km}^{-2}$   
201 and diffusion constant  $D_{\text{AFR}} = 63.5 \text{ km}^2/\text{generation}$  for African-Americans across the US, and  
202  $n_{\text{EUR}} = 7.6 \text{ km}^{-2}$  and  $D_{\text{EUR}} = 59.6 \text{ km}^2/\text{generation}$  for European-Americans (Fig. 3E). The



203 ratio of European- to African-American population density is therefore 3.9. According to the  
204 2010 US Census, 13% of the total population have self-identified as “Black or African American  
205 alone” and 72% self-identified as “White alone”. The ratio of European- to African-American  
206 population size from census is 5.5, in good agreement to our estimate above. Interestingly, the  
207 root mean squared displacement per generation,  $2\sqrt{D \times 1 \text{ generation}} \sim 15 - 16$  km, shows  
208 comparable local migration rates in European-Americans and African-Americans despite the  
209 different histories and population densities.

## 210 **Conclusion**

211 The history of African-American populations combines strong ties to place with large-scale  
212 migrations (4). This comprehensive study shows the combined effects of fine-scale population  
213 structure, large-scale migrations, and admixture among African-Americans, giving us a bet-  
214 ter understanding of how the dramatic history of African-Americans shaped genomic diversity  
215 and, in particular, the sharing of haplotypes that can harbor rare, recent variation. From a med-  
216 ical genetics perspective, the sharing of recent haplotypes is a good proxy for the sharing of  
217 large-effect deleterious alleles (25). Rare genetic traits are therefore much more likely to be  
218 shared over long distances among African-Americans than among European-Americans, par-  
219 ticularly along the routes of the Great Migration, but their spatial distributions over short ranges  
220 remain far from uniform. In addition, the ancestry-biased migration indicates a strong correla-  
221 tion between genetic and environmental population structure. Detailed demographic modeling  
222 should therefore inform the sampling and analysis of large genetic cohorts that include African-  
223 Americans.

## 224 **References**

225 1. Voyages Database. Voyages: The Trans-Atlantic slave trade database (2009). URL [http:](http://)

226 //www.slavevoyages.org.

227 2. Ruggles, S. *et al.* Integrated Public Use Microdata Series: Version 5.0 [machine-readable  
228 database]. Tech. Rep., University of Minnesota, Minneapolis (2010).

229 3. Wilkerson, I. *The warmth of other suns: The epic story of America's great migration*  
230 (Vintage, 2010).

231 4. Lemann, N. *The Promised Land: The Great Black Migration and How It Changed America*  
232 (Vintage, 1992).

233 5. Bustamante, C. D., De La Vega, F. M. & Burchard, E. G. Genomics for the world. *Nature*  
234 **475**, 163–165 (2011).

235 6. Burchard, E. G. Missing patients. *Nature* **513**, 301–302 (2014).

236 7. Tishkoff, S. A. *et al.* The genetic structure and history of Africans and African Americans.  
237 *Science* **324**, 1035–1044 (2009).

238 8. Parra, E. J. *et al.* Estimating African American admixture proportions by use of population-  
239 specific alleles. *The American Journal of Human Genetics* **63**, 1839–1851 (1998).

240 9. Kidd, J. M. *et al.* Population genetic inference from personal genome data: Impact of  
241 ancestry and admixture on human genomic variation. *The American Journal of Human*  
242 *Genetics* **91**, 660–671 (2012).

243 10. Bryc, K. *et al.* Genome-wide patterns of population structure and admixture in West  
244 Africans and African Americans. *Proceedings of the National Academy of Sciences* **107**,  
245 786–791 (2012).

- 246 11. Maples, B. K., Gravel, S., Kenny, E. E. & Bustamante, C. D. RFMix: A discriminative  
247 modeling approach for rapid and robust local-ancestry inference. *The American Journal of*  
248 *Human Genetics* **93**, 278–288 (2013).
- 249 12. Bryc, K., Durand, E. Y., Macpherson, J. M., Reich, D. & Mountain, J. L. The genetic  
250 ancestry of African Americans, Latinos, and European Americans across the United States.  
251 *The American Journal of Human Genetics* **96**, 37–53 (2015).
- 252 13. Zakharia, F. *et al.* Characterizing the admixed African ancestry of African Americans.  
253 *Genome Biology* **10**, R141 (2009).
- 254 14. Auton, A. *et al.* Global distribution of genomic diversity underscores rich complex history  
255 of continental human populations. *Genome Research* **19**, 795–803 (2009).
- 256 15. Smith, M. W. *et al.* A high-density admixture map for disease gene discovery in African  
257 Americans. *The American Journal of Human Genetics* **74**, 1001–1013 (2004).
- 258 16. Gravel, S. Population genetics models of local ancestry. *Genetics* **191**, 607–619 (2012).
- 259 17. Lind, J. M. *et al.* Elevated male European and female African contributions to the genomes  
260 of African American individuals. *Human Genetics* **120**, 713–722 (2007).
- 261 18. Berlin, I. *The Making of African America: The Four Great Migrations* (Penguin, 2010).
- 262 19. Hayes, K. H. *Slavery Before Race: Europeans, Africans, and Indians at Long Island's*  
263 *Sylvester Manor Plantation* (New York University Press, 2013).
- 264 20. Moreno-Estrada, A. *et al.* The genetics of Mexico recapitulates Native American substructure  
265 and affects biomedical traits. *Science* **344**, 1280–1285 (2014).

- 266 21. Fejerman, L. *et al.* Genome-wide association study of breast cancer in Latinas identifies  
267 novel protective variants on 6q25. *Nature Communications* **5**, 5260 (2014).
- 268 22. Ramachandran, S. *et al.* Support from the relationship of genetic and geographic distance  
269 in human populations for a serial founder effect originating in Africa. *Proceedings of the*  
270 *National Academy of Sciences* **102**, 15942–15947 (2005).
- 271 23. The Genome of the Netherlands Consortium. Whole-genome sequence variation, popu-  
272 lation structure and demographic history of the Dutch population. *Nature Genetics* **46**,  
273 818–825 (2014).
- 274 24. Palamara, P. F., Lencz, T., Darvasi, A. & Pe'er, I. Length distributions of identity by  
275 descent reveal fine-scale demographic history. *The American Journal of Human Genetics*  
276 **91**, 809–822 (2012).
- 277 25. Browning, S. R. & Thompson, E. A. Detecting rare variant associations by identity-by-  
278 descent mapping in case-control studies. *Genetics* **190**, 1521–1531 (2012).
- 279 26. Juster, F. T. & Suzman, R. An overview of the Health and Retirement Study. *The Journal*  
280 *of Human Resources* **30**, S7–S56 (1995).
- 281 27. Signorello, L. B. *et al.* Southern community cohort study: establishing a cohort to investi-  
282 gate health disparities. *Journal of the National Medical Association* **97**, 972–979 (2005).
- 283 28. The 1000 Genomes Project Consortium. An integrated map of genetic variation from 1,092  
284 human genomes. *Nature* **491**, 56–65 (2012).
- 285 29. Chang, C. C. *et al.* Second-generation PLINK: Rising to the challenge of larger and richer  
286 datasets. *GigaScience* **4**, 7 (2015).

- 287 30. Turner, S. *et al.* Quality control procedures for genome-wide association studies. *Current*  
288 *Protocols in Human Genetics* **68**, 1.19.1–1.19.18 (2011).
- 289 31. Delaneau, O., Zagury, J.-F. & Marchini, J. Improved whole-chromosome phasing for dis-  
290 ease and population genetic studies. *Nature Methods* **10**, 5–6 (2012).
- 291 32. Gusev, A. *et al.* Whole population, genome-wide mapping of hidden relatedness. *Genome*  
292 *Research* **19**, 318–326 (2009).
- 293 33. Durand, E. Y., Eriksson, N. & McLean, C. Y. Reducing pervasive false-positive identical-  
294 by-descent segments detected by large-scale pedigree analysis. *Molecular Biology and*  
295 *Evolution* **31**, 2212–2222 (2014).
- 296 34. Arfken, G. B. & Weber, H. J. *Mathematical Methods for Physicists* (Academic Press,  
297 Orlando, FL, 1985), 3rd edn.
- 298 35. Zheng, X. *et al.* A high-performance computing toolset for relatedness and principal com-  
299 ponent analysis of SNP data. *Bioinformatics* **28**, 3326–3328 (2012).
- 300 36. Alexander, D. H., Novembre, J. & Lange, K. Fast model-based estimation of ancestry in  
301 unrelated individuals. *Genome Research* **19**, 1655–1664 (2009).

## 302 **Acknowledgements**

303 This work was supported by CIHR through the Canada Research Chair program and operating  
304 grant MOP-136855 (to S.G.) and NSF DMS award 1201234 (to C.D.B.).

## Supplementary Materials

### The Great Migration and African-American genomic diversity

Soheil Baharian, Maxime Barakatt, Christopher R. Gignoux, Suyash Shringarpure,  
Jacob Errington, William J. Blot, Carlos D. Bustamante, Eimear E. Kenny,  
Scott M. Williams, Melinda C. Aldrich, Simon Gravel

## Contents

|     |                                                                             |           |
|-----|-----------------------------------------------------------------------------|-----------|
| 311 | <b>1 Methods</b>                                                            | <b>19</b> |
| 312 | 1.1 Data . . . . .                                                          | 19        |
| 313 | 1.2 Data merging and quality control . . . . .                              | 20        |
| 314 | 1.3 Geographic information . . . . .                                        | 21        |
| 315 | 1.4 IBD inference . . . . .                                                 | 22        |
| 316 | 1.5 Regional relatedness using genomic data . . . . .                       | 23        |
| 317 | 1.5.1 Visualization of regional relatedness . . . . .                       | 25        |
| 318 | 1.6 Regional relatedness using census data . . . . .                        | 25        |
| 319 | 1.7 Significance test for genomic versus census-based relatedness . . . . . | 28        |
| 320 | 1.8 Relatedness and isolation-by-distance . . . . .                         | 29        |
| 321 | 1.9 Expected $T_{\text{MRCA}}$ given length of IBD segments . . . . .       | 35        |
| 322 | 1.10 Local and global ancestry analysis . . . . .                           | 37        |
| 323 | 1.11 Quality control of local ancestry inference . . . . .                  | 37        |
| 324 | 1.12 TRACTS and timing estimates . . . . .                                  | 38        |
| 325 | 1.12.1 Two-population admixture models . . . . .                            | 40        |
| 326 | 1.12.2 Three-population admixture models . . . . .                          | 41        |
| 327 | 1.12.3 Confidence intervals for timing estimates . . . . .                  | 43        |
| 328 | <b>2 Supplementary text, figures, and tables</b>                            | <b>43</b> |

|     |       |                                                                   |    |
|-----|-------|-------------------------------------------------------------------|----|
| 329 | 2.1   | Additional details on cohorts . . . . .                           | 43 |
| 330 | 2.2   | Number of individuals in each census region or division . . . . . | 43 |
| 331 | 2.3   | Detailed geographic location of individuals . . . . .             | 45 |
| 332 | 2.3.1 | HRS . . . . .                                                     | 45 |
| 333 | 2.3.2 | SCCS . . . . .                                                    | 47 |
| 334 | 2.4   | Principal component analysis . . . . .                            | 47 |
| 335 | 2.5   | Global ancestry estimates . . . . .                               | 49 |
| 336 | 2.6   | African-Americans of Hispanic background . . . . .                | 49 |
| 337 | 2.7   | Time of admixture by region . . . . .                             | 53 |
| 338 | 2.8   | List of related individuals . . . . .                             | 53 |
| 339 | 2.9   | Distribution of shared IBD tracts . . . . .                       | 54 |
| 340 | 2.10  | Regional IBD relatedness and sampling locations . . . . .         | 56 |
| 341 | 2.11  | Census-based regional relatedness . . . . .                       | 59 |

## 342 **1 Methods**

### 343 **1.1 Data**

344 We used the genotype data of 12,454 individuals from the Health and Retirement Study (26)  
345 (HRS), genotyped on the Illumina Human Omni 2.5M platform, and of 2,169 African-American  
346 individuals from the Southern Community Cohort Study (27) (SCCS), genotyped on either Il-  
347 lumina Human Omni 2.5M or Human 1M-Duo platforms. The HRS cohort includes 1,649 indi-  
348 viduals who self-identified as African-Americans (non-ambiguously in both HRS Tracker and  
349 dbGaP databases) and 10,432 individuals who self-identified as European-Americans. There  
350 are also 366 individuals labeled as “Others” whom we have not used in our main analyses  
351 (except in a PCA analysis, discussed below). The remaining 7 individuals have ambiguous,

352 non-matching race identifiers in HRS Tracker and dbGaP, and we have, thus, excluded them  
353 from our analyses.

354 We performed comparisons with data from 23andMe (*12*) and from 97 individuals of African  
355 ancestry from the southwest USA (ASW) from the 1000 Genomes Project<sup>1</sup> (*28*). The 23andMe  
356 cohort includes many African-American individuals and has been the subject of a detailed pop-  
357 ulation genetic analysis (*12*), and the ASW cohort has been a reference African-American pop-  
358 ulation in recent studies. However, these two cohorts were not meant to be representative of the  
359 US population. The 23andMe database has a complex ascertainment scheme, which may cause  
360 biases in ancestry and socioeconomic status. In particular, biases in regional representation and  
361 a small amount of survey response errors might lead to a lower European ancestry proportion.  
362 These possible biases are described in detail in (*12*). Similarly, the ASW cohort was assem-  
363 bled from duos and trios with at least one Oklahoma resident, but with no attempt to reach  
364 geographic or demographic representativeness. For comparisons with the 23andMe study, we  
365 used the global ancestry proportions reported in (*12*), because the genotype data is not publicly  
366 available.

367 The use of these samples for the present study was approved by the IRB at McGill University  
368 and Stanford University, where the analyses were performed.

## 369 **1.2 Data merging and quality control**

370 The HRS genotype data that we received had been already quality controlled, filtered, and  
371 phased. The SCCS cohort comprises data from 648 individuals in a breast cancer study (geno-  
372 typed on Illumina Omni 2.5M platform) and 760 individuals in a prostate cancer study, 484  
373 individuals in a lung cancer study, and 277 individuals in a colorectal cancer study (geno-  
374 typed on Illumina Human 1M-Duo). All genotyped individuals were either cases or controls in

---

<sup>1</sup> [ftp://ftp.1000genomes.ebi.ac.uk/vol1/ftp/release/20130502/supporting/hd\\_genotype\\_chip/](ftp://ftp.1000genomes.ebi.ac.uk/vol1/ftp/release/20130502/supporting/hd_genotype_chip/)



375 their respective nested case-control studies. We converted the lung cancer dataset from human  
376 genome assembly hg18 to hg19 using the LiftOver utility from the UCSC Genome Bioinforma-  
377 tics Group and merged the four separate SCCS datasets into one using PLINK 1.9 (29).  
378 During the merge process, we removed markers to which more than one name was assigned  
379 at the same position along a chromosome; removed markers with missing genotype calls; cor-  
380 rected unambiguous strand misassignments and removed ambiguous strand (mis)assignments;  
381 removed multi-allelic markers; and, finally, filtered the data for missing calls (30) first based on  
382 genotypes (PLINK argument `--geno 0.0125`) and then based on call rates per individual  
383 and minor allele frequency (PLINK arguments `--mind 0.0125 --maf 0.01`). The final  
384 SCCS dataset contains 2,128 individuals and 585,527 variants after these steps. We then used  
385 the same process to merge the HRS data with those of SCCS and ASW, resulting in a single  
386 dataset in PLINK format with 14,679 individuals and 553,795 variants. Performing a PCA on  
387 the data (pruning for LD leaves 77,902 markers), we found no batch effects (see Fig. S13). We  
388 then phased the merged data with SHAPEIT2 (31) (default arguments), and converted the out-  
389 put to PLINK format (while preserving the phasing information) using genetic map information  
390 from the 1000 Genomes Project data<sup>2</sup>.

### 391 **1.3 Geographic information**

392 Geographic information in HRS is usually provided in the form of US census regions and divi-  
393 sions. We have used these locales in the ancestry analyses. ZIP code information for HRS study  
394 participants is available, but use of this data is restricted. We used zip code data only for the  
395 fine-scale spatial analysis of identity-by-descent relatedness. For SCCS, latitude and longitude  
396 coordinates of clinics were available. In the IBD analysis, we assigned the ASW individuals  
397 to the West South Central census division. In terms of geographic locations, we restrict our

---

<sup>2</sup>[http://mathgen.stats.ox.ac.uk/impute/data\\_download\\_1000G\\_phase1\\_integrated\\_SHAPEIT2\\_9-12-13.html](http://mathgen.stats.ox.ac.uk/impute/data_download_1000G_phase1_integrated_SHAPEIT2_9-12-13.html)

398 analyses to the census divisions in the contiguous United States (i.e., Pacific, Mountain, West  
399 North Central, East North Central, Middle Atlantic, New England, West South Central, East  
400 South Central, South Atlantic).

401 For the individuals in HRS, we only consider the ones born in the contiguous US who,  
402 at the time of sampling in 2010, also lived in the contiguous US; this reduces our sample  
403 size in HRS to 10,974 individuals of which 1,501 are self-identified African-Americans and  
404 9,308 are self-identified European-Americans (with the remaining individuals being classified  
405 as “Others”). There are 4 additional individuals satisfying the geographic constraints above  
406 but have discordant race identifiers in two different data files provided with the cohort data;  
407 these were removed from any downstream analysis. Among the unambiguous self-identified  
408 African-Americans and European-Americans mentioned above, there are respectively 10 and  
409 427 individuals also self-identifying as Hispanics. The former 10 individuals are only included  
410 in our analysis of Hispanics status.

411 African-American sample sizes in the New England and Mountain census divisions are  
412 small. We therefore merged the New England and Middle Atlantic divisions, and considered  
413 the Northeast census region as a whole. Similarly, we merged the Mountain and Pacific, and  
414 considered the West census division as a whole. The total number of geographic locales under  
415 consideration was therefore 7: Northeast, Midwest consisting of 2 divisions, South consisting  
416 of 3 divisions, and West (see Table S5).

## 417 **1.4 IBD inference**

418 We used GERMLINE (32) (arguments `-err_hom 1 -haploid -bits 32 -w_extend`)  
419 to infer IBD tracts of length  $3\text{ cM}$  or larger shared between individuals from the HRS, SCCS,  
420 and ASW cohorts. GERMLINE is prone to false positive IBD assignment (see, e.g., (33)). We  
421 used a heuristic filtering scheme to identify and filter regions with large excess of IBD. We first

422 count the number of overlapping IBD segments at each genomic position across all individuals.  
423 A chromosomal region is then marked as “forbidden” if the total number of IBD segments over-  
424 lapping it is larger than 25,000, since the background IBD has an approximate depth of 15,000.  
425 Next, two forbidden regions will be merged as one if they are less than 0.1 cM apart. IBD seg-  
426 ments that overlap these forbidden regions are excluded from the downstream analysis unless  
427 they extend outside the forbidden regions by at least 3 cM. In that case, we presume that there  
428 is sufficient evidence in the non-forbidden regions, and the segments are therefore kept. After  
429 this filtering process, we are left with 8,664,251 IBD segments out of the total of 71,633,425.

## 430 **1.5 Regional relatedness using genomic data**

431 Geographic information along with the inferred IBD segments were used to construct a relat-  
432 edness metric between individuals and geographic regions within our cohorts. We first bin the  
433 IBD segments by length. The first bin contains segments of length between 3 cM to 10 cM, the  
434 second bin contains segments from 10 cM to 18 cM, and the last bin contains segments of length  
435 18 cM or longer. The latter bin corresponds to common ancestors living about 8 generations ago  
436 and is the focus of most of our discussion. Sorting the individuals by region and by African-  
437 American status within each region, we form two sparse relatedness matrices:  $\mathcal{L}$  which contains  
438 the total IBD *length* shared between each pair of individuals, and  $\mathcal{N}$  which contains the total  
439 *number* of shared IBD segments between each pair of individuals. We have to emphasize that  
440 the diagonal elements of  $\mathcal{L}$  and  $\mathcal{N}$ , which represent self-IBD, are zero by definition.

441 We next remove the contributions of closely related individuals from these matrices as fol-  
442 lows. The HRS study has already identified 89 pairs of individuals having kinship coefficients  
443 greater than or equal to 0.1. To be consistent with the definition from HRS, we used PLINK to  
444 calculate kinship coefficients for SCCS and ASW individuals, labelling individuals with kinship  
445 coefficient of 0.1 or higher as related individuals. We find 22 related pairs among SCCS indi-

446 individuals, 62 related pairs among ASW individuals, and 1 related pair between HRS and SCCS  
447 individuals (details below).

448 To see how geographic regions are associated based on the genetic relatedness of their in-  
449 habitants, we consider average pairwise IBD relatedness between regions (23). We take as the  
450 average pairwise relatedness  $L$  between two regions  $R_1$  and  $R_2$  the mean length of IBD seg-  
451 ments shared between pairs of individuals, where one individual is from  $R_1$  and the other from  
452  $R_2$ . In addition, we consider the relationships between individuals of specific ancestry  $S_1$  and  
453  $S_2$ , each representing either African-American or European-American. Thus, the average total  
454 shared IBD length becomes

$$L_{(R_1, S_1), (R_2, S_2)} = \frac{\sum'_{i,j} \mathcal{L}_{ij}}{N_{\text{pairs}}} \quad (2)$$

455 where

- 456 •  $i$  and  $j$  represent individuals as indexed in  $\mathcal{L}$ ;
- 457 • the primed sum runs over relevant pairs  $(i, j)$  such that  $i < j$ ,  $(R(i), S(i)) = (R_1, S_1)$   
458 and  $(R(j), S(j)) = (R_2, S_2)$ , where  $R(i)$  and  $S(i)$  denote the region and race status for  
459 individual  $i$ ;
- 460 •  $N_{\text{pairs}} = n_1 n_2$  if  $R_1 \neq R_2$  and  $n_1(n_1 - 1)/2$  otherwise with  $n_i$  being the number of  
461 individuals with attributes  $(R_i, S_i)$ .

462 Using the metric defined above, we can calculate the pattern of relatedness between geographic  
463 locations with African-Americans, with European-Americans, and between African-Americans  
464 and European-Americans. The first two matrices are symmetric if we change the order of  
465 regions, whereas the last one is not.

### 466 **1.5.1 Visualization of regional relatedness**

467 The following criteria was used for visualization of the IBD relatedness between regions. Due to  
468 the small number of African-American sampled individuals in the northern and western regions,  
469 the total number of IBD segments shared between these regions is small compared with that  
470 between other regions: see the bottom row in Fig. S22. Relatedness estimations are noisy for  
471 such pairs, and a scale that accommodates these noisy results would not allow for detailed  
472 comparison of less noisy results. Therefore, in Figs. 3, S20, and S21, we did not draw the lines  
473 between any two regions for which the total number of possible pairs of IBD individuals is less  
474 than 10,000 (e.g., notice the lack of connecting lines from West North Central to West). Since  
475 a significant number of the individuals in HRS are European-Americans, the number of IBD  
476 segments shared between European-Americans residing in any two regions is large enough to  
477 ensure the significance of the results, even when we restrict the analysis to the longest IBD  
478 segments (see the bottom row in Fig. S23).

### 479 **1.6 Regional relatedness using census data**

480 The relatedness pattern derived from genomic data can be compared with historical migration  
481 records, available from Integrated Public Use Microdata Series (IPUMS) (2). We downloaded  
482 census data from 1900 to 1980 and extracted census year, census region, age, race, birth place,  
483 and weighted representation of each sample; the latter is the number of people in the population  
484 represented by the sampled individual. We focus on the people in the age group of 20- to  
485 30-year olds for any decade, and consider the migrations of African-Americans and European-  
486 Americans separately. We assume a generation time of 30 years, thereby taking census years  
487 1900, 1910, and 1920 as generation 3; 1930, 1940, and 1950 as generation 2; and 1960, 1970,  
488 and 1980 as generation 1. For each race group, we construct a matrix whose elements  $m_{ij}$  are  
489 the number of migrations for each generation from region  $i$  to region  $j$ ; this matrix is highly

490 asymmetric because of asymmetric migrations.

491 We now construct a heuristic census-based measure of relatedness between regions. Let us  
492 define  $p_{i \rightarrow j}^{(g)}$  as the proportion of individuals at generations  $g - 1$  in region  $j$  with ancestors at  
493 generations  $g$  in region  $i$ . In other words, the  $(i, j)$  element of the matrix  $P^{(g)}$  is

$$p_{i \rightarrow j}^{(g)} = \frac{m_{ij}^{(g)}}{\sum_{i'} m_{i'j}^{(g)} + m_{\text{out} \rightarrow j}^{(g)}} \quad (3)$$

494 where  $g \in \{1, 2, 3\}$  denotes the generation time of the ancestral population, and  $m_{\text{out} \rightarrow j}^{(g)}$  is the  
495 number of migrants from outside of contiguous United States into the census region  $j$ . Had we  
496 not included migrations from outside US into the mainland US,  $P^{(g)}$  would have been column-  
497 normalized (i.e., normalized with respect to the destination census regions).

498 We construct a three-generation transition matrix as:

$$\bar{P} = P^{(3)} P^{(2)} P^{(1)}. \quad (4)$$

499 This definition for  $\bar{P}_{ij}$  takes into account all possible migration routes starting at region  $i$  and  
500 ending at region  $j$  that could have taken place in the span of the three generations.

501 To estimate genetic relatedness between different geographic regions, we further make the  
502 extremely coarse assumption that population sizes were constant before 1910, and that popula-  
503 tions were randomly mating. These assumptions allow us to model expected relatedness within  
504 regions using coalescent theory before the massive 20th century migrations. Neither assumption  
505 is expected to hold, but the resulting relatedness metric remains informative as long as census  
506 population size correlate with the expected time to the most recent common ancestor for a given  
507 pair of lineages in a region.

508 Given  $\bar{P}_{k,i}$  as the probability of a sampled individual from region  $i$  having an ancestor from  
509 region  $k$ , we define the census relatedness metric between regions  $i$  and  $j$  as

$$I_{ij} = \sum_k \bar{P}_{ki} \bar{P}_{kj} \frac{1}{N_k} \quad (5)$$

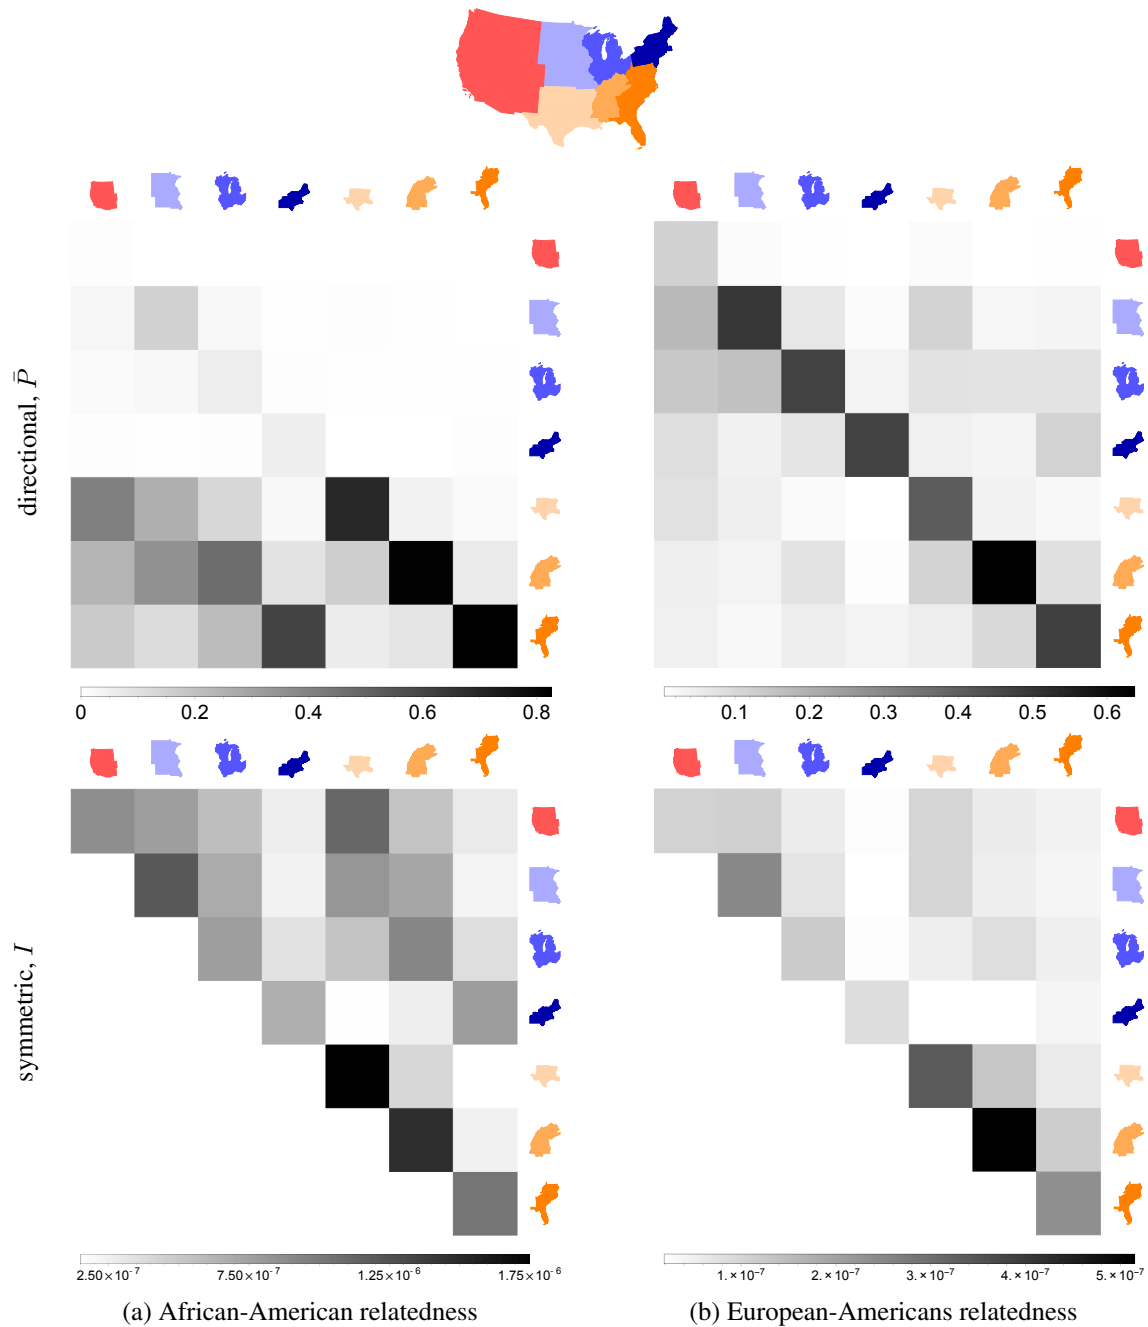

Figure 4: Census-based predicted relatedness between (a) African-Americans and (b) European-Americans across the US census regions. The top row shows the directional metric  $\bar{P}$ , whereas the bottom row shows the symmetric one  $I$ . In the top figures (read column-wise), each column shows for its respective census region the proportion of ancestral population which originated from other census regions. See Fig. S25 for the numerical values of these regional relatedness metrics.

510 where  $N_k$  is the census population size of region  $k$ . Population size matters, because in larger  
511 populations, it is less likely that a given pair of individuals share a common ancestor. If  $N_k$  is  
512 large enough, the number of common ancestors at each generation is inversely proportional to  
513  $N_k$ , and therefore the expected recent shared ancestry is approximately inversely proportional  
514 to  $N_k$ . Thus,  $I_{ij}$  is proportional to the probability of two individuals from regions  $i$  and  $j$  having  
515 ancestors from (any) region  $k$  times the probability that these ancestors have a recent common  
516 ancestor within region  $k$ . Unlike  $\bar{P}$  which is a directional metric,  $I$  is non-directional and  
517 symmetric and can be directly compared with genetic relatedness matrix  $L$  in Eq. (2), which  
518 was estimated using IBD data. The regional relatedness patterns derived using  $\bar{P}$  and  $I$  are  
519 shown in Fig. S4.

## 520 **1.7 Significance test for genomic versus census-based relatedness**

521 To test the hypothesis regarding South-to-North migration corridors, we consider the matrix  
522 elements corresponding to relatedness between the three southern regions (South Atlantic, East  
523 South Central, West South Central) and the three northern ones (Northeast, East North Central,  
524 West North Central), forming a  $3 \times 3$  matrix from the census data to be compared with the  
525 corresponding matrix from IBD data. To quantify the correlation between these two matrices,  
526 we use the Mantel test as follows. Given that all the elements in each of these two matrices are  
527 independent, we perform  $9!$  possible permutations on the elements of the matrix derived from  
528 the census data and calculate the Pearson correlation coefficient between the original IBD matrix  
529 and the permuted census matrix. We then accept or reject each permutation based on whether  
530 the calculated correlation coefficient is lower or higher than the correlation coefficient between  
531 the two original (non-permuted) matrices. The  $p$ -value is given by the ratio of the number of  
532 rejections to the total number of permutations (see main text for the numerical values). The  $p$ -  
533 value reported in the main text for the relatedness between South to North and West are derived



| birth year | number of individuals |
|------------|-----------------------|
| < 1920     | 57                    |
| 1920 – 24  | 79                    |
| 1925 – 27  | 59                    |
| 1928 – 30  | 78                    |
| 1931 – 33  | 133                   |
| 1934 – 36  | 174                   |
| 1937 – 39  | 177                   |
| 1940 – 42  | 178                   |
| 1943 – 45  | 110                   |
| 1946 – 48  | 147                   |
| 1949 – 52  | 140                   |
| 1953 – 55  | 134                   |
| > 1955     | 70                    |

Table 2: Distribution of birth years in HRS

534 by performing a random subset of  $10^7$  permutations out of a total of  $12!$  ones.

535 We also perform this test while using the region of birth of HRS individuals as their location.  
536 Given the average year of birth (1939.8) and the birth year distribution (Table S2) in HRS, we  
537 only take for consistency generation 3 from the census data (see definition above) and write  
538  $\bar{P} = P^{(3)}$  as our overall directional relatedness matrix (compare with Eq. (4) above). We then  
539 proceed as before to calculate the non-directional (symmetric) relatedness  $I$ . Given the new  
540 census-based prediction (using only  $g = 3$  above) and the IBD relatedness pattern (using the  
541 region of birth), we perform a Mantel test as before in order to find the correlation between the  
542 data and our prediction.

## 543 **1.8 Relatedness and isolation-by-distance**

544 We wish to model the expected IBD relatedness between individuals in a spatially extended  
545 population. Our starting point is an idealized population living on a set of islands (or demes),  
546 with random mating within islands and migrations between the islands. We will consider a  
547 limiting example of a continuous population below.

548 We are first interested in the probability that a genomic segment of given length, stretching  
549 across a specific locus, is shared identical-by-descent between two randomly selected individu-  
550 als living on different islands. For identity-by-descent to occur, we need two events to happen:  
551 first, lineages at that locus must have coexisted on one unknown island at some point in the past.  
552 Second, these two geographically coexisting lineages must also have coalesced further in the  
553 past.

554 We measure time in generations and track lineages backwards in time. At each generation,  
555 we assume that the displacement between parental birthplace and offspring birthplace follows  
556 a random walk. Each lineage traverses follows a random walk on the islands, with each step  
557 representing one generation back in time, connecting an individual to the ancestor from whom  
558 the locus is inherited. The lineages are then traced back until the time at which both ancestors  
559 coexist on the same island and coalesce in the most recent common ancestor in the next step  
560 back in time. We can, therefore, symbolically write for the total probability of coalescence at a  
561 given generation as a probability of coexistence times a probability of coalescence:

$$p(\text{coalescence}) = \sum_{\text{island}} p(\text{lineage}_{1,2} \in \text{island}) \times p(\text{coalescence} | \text{lineage}_{1,2} \in \text{island}). \quad (6)$$

562 To derive the probability of coexistence, we first want to estimate the expected position of a  
563 lineage given its position in the past. Concretely, let  $\mathbf{x}_0$  be the current location of an individual  
564 at  $t = 0$ . We would like to find  $\Phi(\mathbf{x}, t | \mathbf{x}_0)$ , the probability that an individual's lineage is on  
565 island  $\mathbf{x}$  at  $t$  generations ago, given that it is currently on island  $\mathbf{x}_0$ .

566 By construction, the probability  $\Phi(\mathbf{x}, t | \mathbf{x}_0)$  takes into account contributions from *all* possible  
567 space-time paths that start at  $\mathbf{x}_0$  and end at  $\mathbf{x}$  at time  $t$ . For instance, a possible path is to arrive  
568 at  $\mathbf{x}$  at  $t/2$  and stay at that position until  $t$ , whereas another path is to arrive at  $\mathbf{x}$  at  $t/3$ , leave  $\mathbf{x}$   
569 at the next step for a series of random walks to finally arrive at  $\mathbf{x}$  again at  $t$ .

570 Consider a region of area  $\Delta A_i$  that encompasses a deme with haploid population  $2n(\mathbf{x}_i, t)\Delta A_i$ ,

571 where  $n(\mathbf{x}_i, t)$  is the effective diploid population density at position  $\mathbf{x}_i$  and time  $t$  in the past.  
 572 The probability of that two lineages in  $\Delta A_i$  coalesce in a given generation is

$$p_{\text{coal}}(\mathbf{x}_i, t) = \frac{1}{2n(\mathbf{x}_i, t)\Delta A_i}. \quad (7)$$

573 This expression does not consider the possibility of multiple coalescent events and is therefore  
 574 appropriate only for a number of generations that is much less than the population size. More-  
 575 over, the discrete probability of two lineages having coexisted on the deme at  $\mathbf{x}_i$  at time  $t$  in the  
 576 past, given that they are a distance  $\mathbf{R}$  apart (at  $\mathbf{x}_0$  and  $\mathbf{x}_0 + \mathbf{R}$ ) at present (at  $t = 0$ ), is

$$p_{\text{coex}}(\mathbf{x}_i, t|\mathbf{R}) = \Phi(\mathbf{x}_i, t|\mathbf{x}_0)\Phi(\mathbf{x}_i, t|\mathbf{x}_0 + \mathbf{R}). \quad (8)$$

577 Therefore, the total probability of having a common ancestor  $t$  generations ago in the discrete  
 578 model is

$$p(t|\mathbf{R}) = \sum_i \frac{\Phi(\mathbf{x}_i, t|\mathbf{x}_0)\Phi(\mathbf{x}_i, t|\mathbf{x}_0 + \mathbf{R})}{2n(\mathbf{x}_i, t)\Delta A_i}. \quad (9)$$

579 To go from a discrete random walk to the continuous limit, we set  $\Phi(\mathbf{x}, t|\mathbf{x}_0) \rightarrow \varphi(\mathbf{x}, t|\mathbf{x}_0)\Delta A$ ,  
 580 where  $\varphi(\mathbf{x}, t)$  is now a continuous probability density. Thus, in this limit, i.e. with  $\sum_i \Delta A_i \dots \rightarrow$   
 581  $\int d^2\mathbf{x} \dots$ , we get

$$p(t|\mathbf{R}) = \int d^2\mathbf{x} \frac{\varphi(\mathbf{x}, t|\mathbf{x}_0)\varphi(\mathbf{x}, t|\mathbf{x}_0 + \mathbf{R})}{2n(\mathbf{x}, t)}. \quad (10)$$

582 The continuous limit of a random walk process is the diffusion model. In this model, the  
 583 probability density  $\varphi(\mathbf{x}, t)$  of finding a lineage at an infinitesimal area  $d^2\mathbf{x}$  centered around  $\mathbf{x}$  at  
 584 generation  $t$  in the past obeys the two-dimensional partial differential equation

$$\frac{\partial}{\partial t}\varphi(\mathbf{x}, t) = \nabla_{\mathbf{x}} \cdot [D(\mathbf{x})\nabla_{\mathbf{x}}\varphi(\mathbf{x}, t)] \quad (11)$$

585 where the diffusion coefficient  $D(\mathbf{x})$  encompasses the information related, in the discrete model,  
 586 to probabilities of taking a step to an adjacent island or staying on the same island<sup>3</sup>. Solving

<sup>3</sup> For connection between a random walk and the diffusion model, see, e.g., <http://ocw.mit.edu/courses/mathematics/18-366-random-walks-and-diffusion-fall-2006/index.htm>

587 for  $\varphi(\mathbf{x}, t|\mathbf{x}_0)$  amounts to solving equation (11) with initial condition  $\varphi(\mathbf{x}, t = 0) = \delta(\mathbf{x} - \mathbf{x}_0)$   
588 where  $\delta(\mathbf{x})$  is the (two-dimensional) Dirac delta function.

589 For simplicity, we consider random walks with uniform probability of transitioning to any  
590 nearest-neighbor island, which translates to a constant (position-independent)  $D$  in the contin-  
591 uous model. We also assume that all islands have the same constant population size, leading  
592 to a population density which, on average, is constant in the continuous model. At each time  
593 step, the following processes occur for each individual: (a) reproduction and subsequent death  
594 according to the Wright-Fisher model and (b) migration of all, some, or none of the individ-  
595 ual's offsprings to other islands. With this definition, tracing back a lineage includes, in each  
596 time step, an offspring-to-parent generation and, potentially, a coalescence event with another  
597 lineage.

598 Under these assumptions, we have

$$\varphi(\mathbf{x}, t|\mathbf{x}_0) = \frac{1}{4\pi Dt} \exp\left(-\frac{|\mathbf{x} - \mathbf{x}_0|^2}{4Dt}\right) \quad (12)$$

599 which, in turn, leads to

$$p(t|\mathbf{R}) = \frac{1}{16\pi nDt} \exp\left(-\frac{R^2}{8Dt}\right) \quad (13)$$

600 with  $R = |\mathbf{R}|$ .

601 Next, following Palamara *et al.* (24), we have for the expected fraction of the genome shared  
602 through segments in the length range  $\ell = [l_{\min}, l_{\max}]$  (in units of Morgans)

$$E_\ell[f|\mathbf{R}] = \int_{l_{\min}}^{l_{\max}} dl \int_0^\infty dt p(l|t)p(t|\mathbf{R}) \quad (14)$$

603 with  $p(l|t) = (2t)^2 l \exp(-2tl)$  the probability density of an IBD segment of length  $l$  (in units  
604 of Morgans) spanning the locus shared by the two randomly chosen individuals whose lineages  
605 coalesce  $t$  generations ago. Performing the integrals above leads to the following closed form

606 solution for the expected fraction of the genome shared as a function of spatial separation

$$E_{\ell}[f|\mathbf{R}] = \frac{1}{16\pi nD} \left\{ 2 \left[ K_0 \left( \frac{R}{r_{\min}} \right) - K_0 \left( \frac{R}{r_{\max}} \right) \right] + \left[ \frac{R}{r_{\min}} K_1 \left( \frac{R}{r_{\min}} \right) - \frac{R}{r_{\max}} K_1 \left( \frac{R}{r_{\max}} \right) \right] \right\} \quad (15)$$

607 where  $K_{\alpha}(x)$  is the modified Bessel function of the second kind (34), and  $r_i = \sqrt{D/l_i}$  with  
608  $i \in \{\min, \max\}$ . Expanding for small  $R$ , we find  $E_{\ell}[f|\mathbf{R}] \simeq \frac{1}{16\pi nD} [\ln(l_{\max}/l_{\min}) - (l_{\max} -$   
609  $l_{\min})R^2/4D + O(R^4)]$  for small  $R$ .

610 We can use this estimator to find the shared fraction per chromosome; that is, for each chro-  
611 mosome, we set  $l_{\max}$  in Eq. (15) equal to  $L_c$  (the length of chromosome  $c$ ) to get  $E[f_c|\mathbf{R}] \equiv$   
612  $E_{[l_{\min}, L_c]}[f|\mathbf{R}]$ . The total length of shared IBD tracts (across all chromosomes) between a ran-  
613 dom pair of individuals, therefore, becomes  $E[L|R] = \sum_{c=1}^{22} L_c E[f_c|\mathbf{R}]$ ; this quantity can be  
614 directly compared with that calculated from the IBD data to estimate the parameters of the  
615 model.

616 Access to the exact location of clinics at which the SCCS cohort was sampled allows us to  
617 investigate the relation between IBD relatedness and spatial distance. Having inferred possible  
618 IBD segments using GERMLINE, we calculate, for each pair of individuals from SCCS, the  
619 total length of shared IBD and the distance between the clinics in which they were sampled. We  
620 make the underlying assumption that each individual lives close to the clinic at which he or she  
621 was sampled. Each pair is then placed, based on the distance between the two individuals, into  
622 one of the length bins in  $\{[0, 1), [1, 101), [101, 201), [201, 301), \dots\}$  (all numbers in kilometers).  
623 The first length bin,  $[0, 1)$ , contains individuals sampled at the same clinic. For each bin, we  
624 calculate the average pairwise IBD length (the sum of the IBD lengths of all pairs divided by  
625 the total number of points in the bin) and assign it to a distance equal to the midpoint of the bin  
626 (e.g., for the length bin  $[1, 101)$ , the assigned distance is 51 km). The result is shown in Fig. S5.

627 Apart from the expected decay of relatedness with distance, we also notice the presence of  
628 a constant “background” IBD. This background IBD is larger for smaller IBD segments. As

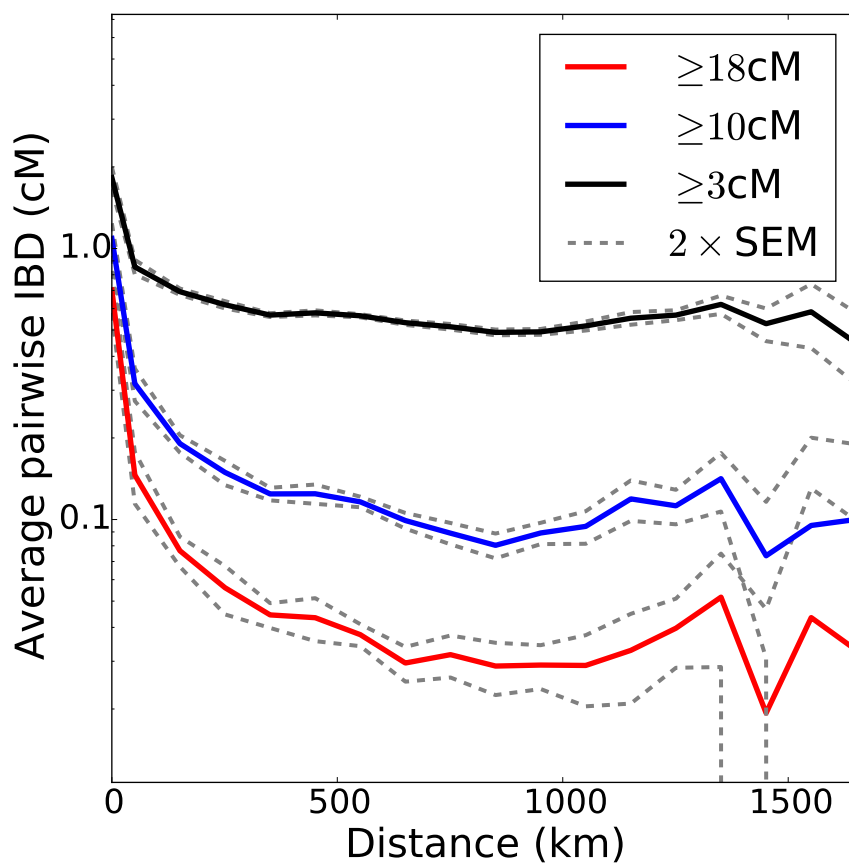

Figure 5: Decay of IBD sharing with distance, calculated for the SCCS cohort, for IBD segments of length 3 cM or larger (top), 10 cM or larger (middle), and 18 cM or larger (bottom). The plot is in log-linear scale, and the dashed lines represent two standard error deviations from the mean for the corresponding curve. The sharp fall-off of the dashed lines at large distances is due to the logarithmic scale of the vertical axis.

629 mentioned in the main text, this could be attributed to two possible factors: (a) GERMLINE has  
630 a higher false positive detection rate for shorter IBD segments (33) which is independent of the  
631 distance between individuals, or (b) smaller IBD segments, being much older on average, reflect  
632 history prior to migrations from Europe and Africa into the Americas. Since this relatedness  
633 patterns extends over long distances with little evidence for decay, we suppose that it is either  
634 due to false positives, or that there was enough mixing in the travels in to the Americas that  
635 present-day proximity is a relatively poor proxy for the proximity of ancestors prior to transat-  
636 lantic travels. In either case, the background IBD can be modeled by adding a constant term  
637 to our model, representing the expected fraction of the genome shared IBD by individuals over  
638 long distances.

639 The parameters to be inferred in this model are the haploid population density  $n$ , the dif-  
640 fusion coefficient  $D$ , and background IBD  $b$ . By fitting the SCCS African-American IBD data  
641 for the 18 cM case (corresponding to the most recent sharing events), we find the estimated  
642 values  $b_{18} = 0.0389$  cM,  $n_{18} = 2.8 \text{ km}^{-2}$ , and  $D_{18} = 88.6 \text{ km}^2/\text{generation}$ . The root mean  
643 squared displacement for African-Americans in the South is thus estimated, using the IBD data  
644 from SCCS, to be 18.8 km. We can use the population density and diffusion coefficient derived  
645 above to predict IBD decay for IBD segments of different lengths and estimate the background  
646 IBD for the other two cases (bins with segments of length 10 cM or larger and with segments  
647 of length 3 cM or larger), finding  $b_{10|18} = 0.120$  cM and  $b_{3|18} = 0.546$  cM. The resulting fits  
648 Fig. S6 show good agreement with the data.

## 649 **1.9 Expected $T_{\text{MRCA}}$ given length of IBD segments**

650 For reference, we derive the expected generation time to the most recent common ancestor  
651 (MRCA), given an IBD tract of certain length. The probability density of having an IBD seg-  
652 ment of length  $l$  (in units of Morgans) spanning a chosen marker (denoted by  $\zeta$ ) inherited from

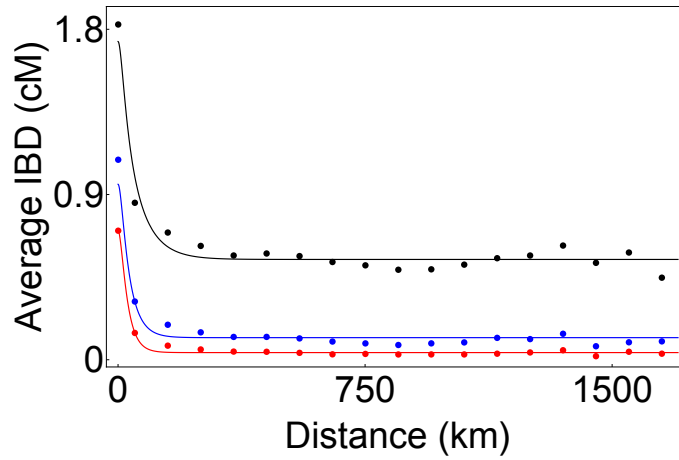

Figure 6: Estimated decay of IBD sharing with distance for IBD segments of length 3 cM or larger (top), 10 cM or larger (middle), and 18 cM or larger (bottom). Points represent the data and lines represent the model.

653 a MRCA living  $g$  generations ago (assumed continuous for simplicity) is (24)

$$p(l|g) = \left(\frac{2g}{1M}\right)^2 l \exp\left(-\frac{2g}{1M} l\right). \quad (16)$$

654 In the Wright-Fisher model, given the shared locus  $\zeta$ , the probability of having a MCRA  $g$   
655 generation ago is

$$p(g) = \frac{1}{N} e^{-g/N} \quad (17)$$

656 where  $N$  is the (constant) effective haploid population size. Therefore, given the length  $l$  of  
657 an IBD tract (in units of Morgans), we use (16) and (17) to find the expected value for the  
658 generation time of the MRCA

$$E[g|l] = \int_0^\infty g p(g|l) dg = \int_0^\infty g \frac{p(l|g)p(g)}{p(l)} dg = \frac{\int_0^\infty g p(l|g)p(g) dg}{\int_0^\infty p(l|g)p(g) dg} \simeq \frac{3}{2(l/1M)} \quad (18)$$

659 where we have assumed that the haploid population size  $N \gg 1$  in the last step.



## 660 **1.10 Local and global ancestry analysis**

661 After the phasing process (discussed previously), we used RFMix (*11*) with arguments `PopPhased`  
662 `--skip-check-input-format` for local ancestry inference along the genome. We used  
663 available parents among the trios in the Southern Han Chinese (CHS), Yoruba in Ibadan, Nige-  
664 ria (YRI), and Utah Residents (CEPH) with Northern and Western European Ancestry (CEU)  
665 populations from the 1000 Genomes Project<sup>4</sup> as a reference panel, comprising 50 CHS, 97 YRI,  
666 and 91 CEU individuals. We extracted the intersecting set of SNPs between our merged dataset  
667 and the three reference populations mentioned above, which we used as the input to RFMix.  
668 RFMix assigned continental ancestry of each marker in each sample to either CHS, YRI, and  
669 CEU, which we interpret as Native American/Asian, African, or European.

## 670 **1.11 Quality control of local ancestry inference**

671 To ensure that the inferred low percentages truly reflect Native American ancestry, and not mis-  
672 assignment of European or African ancestry segments, we performed simulations based on a  
673 two- and a three-population admixture model. In both cases, we generated ancestry tracts for  
674 50 admixed diploid genomes in a forward Wright-Fisher with a single pulse of admixture 8  
675 generations ago.

676 For the two-population admixture model, the ancestry proportions in the simulated individ-  
677 uals were 74.96% African and 25.04% European. We copied genotypes from one YRI sample  
678 into European ancestry segments and one TSI sample into the African segments (both samples  
679 from the 1000 Genomes Project) to generate 100 haploid chromosome 1's. Each chromosome  
680 1 was generated using a distinct source chromosome in the YRI and TSI population. We then  
681 inferred the ancestries of the individual  $i$  (corresponding to haplotypes  $2i$  and  $2i+1$ ) with panels

---

<sup>4</sup> [ftp.1000genomes.ebi.ac.uk/vol1/ftp/phase1/analysis\\_results/supporting/omni\\_haplotypes/](ftp://ftp.1000genomes.ebi.ac.uk/vol1/ftp/phase1/analysis_results/supporting/omni_haplotypes/)

682 composed of samples chosen from 91 CEU, 50 CHS, and 96 YRI, ensuring that the individual  
683 from whom the genotypes were copied was not used in the reference panel. We inferred 74.96%  
684 African, 24.95% European, and 0.09% Native American ancestry.

685 For the three-population admixture model, we simulated a sample of 100 haploid chromo-  
686 somes with 80.9% YRI, 18.2% TSI, and 0.91% JPT ancestry, using the same method described  
687 above. In this case, the inferred proportions were 80.9% African, 18.2% European, and 0.94%  
688 Native American. These results are consistent with previous estimates of false assignment using  
689 a similar pipeline (11).

690 We also considered whether the amount of Native American ancestry in real samples cor-  
691 related with the amount of European ancestry. If European segments are more likely to be  
692 misinterpreted as Native American, we would expect a positive correlation between inferred  
693 Native American and European proportions. Conversely, if the increased diversity in African  
694 segments led to higher rates of misidentification as Native American ancestry, we'd expect the  
695 correlation to be negative. The relation between Native American ancestry and European an-  
696 cestry within SCCS is shown in Fig. S7. Within the southern states, only Louisiana shows a  
697 significant correlation. The lack of global correlation between European and Native American  
698 ancestry helps support the correctness of the inference.

699 Finally, we also compared global ancestry proportions inferred by RFMix and by ADMIX-  
700 TURE (in supervised mode) and found an extremely high correlation between the estimates  
701 from the two methods, as shown in Fig. S8.

## 702 **1.12 TRACTS and timing estimates**

703 To infer time of admixture between ancestral populations and to identify migration models  
704 that give rise to the observed genome-wide patterns of ancestry, we use TRACTS (16). We  
705 excluded for this analysis HRS African-Americans from non-mainland US (96 individuals),

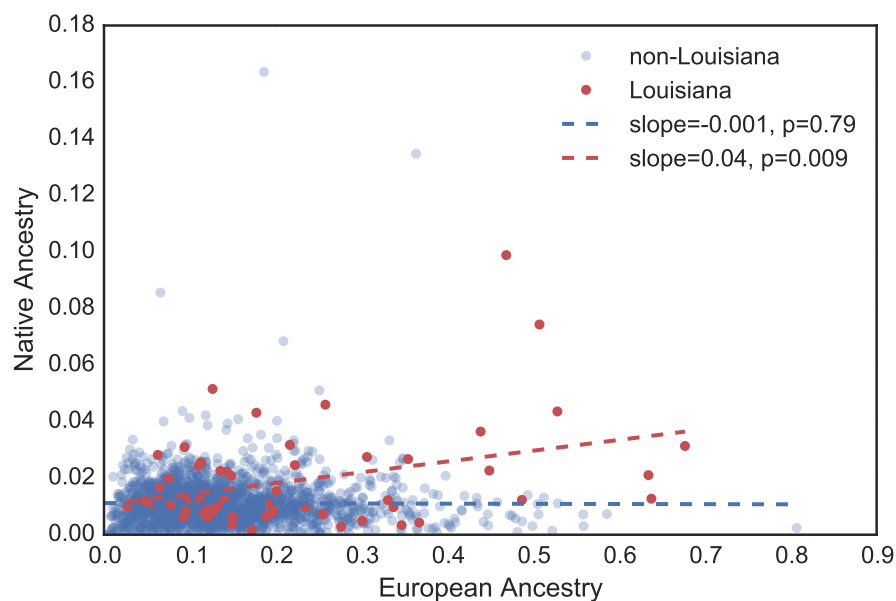

Figure 7: Inferred Native American versus European ancestry in the SCCS cohort.

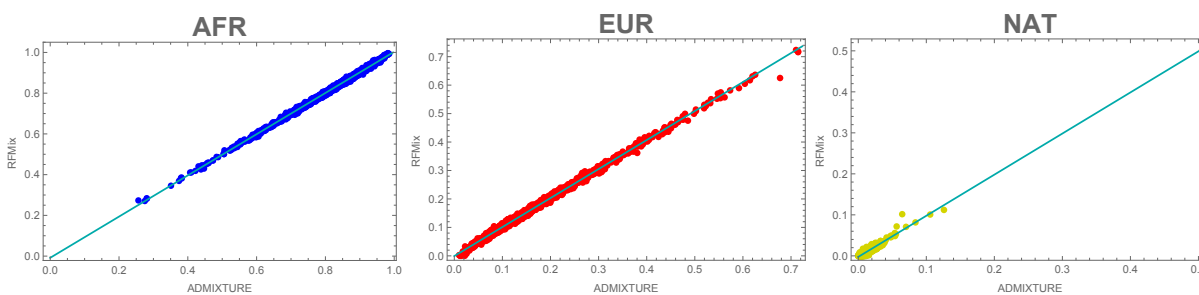

Figure 8: Correlation between continental ancestry (African, European, and Native American/Asian) estimates from RfMix and ADMIXTURE for HRS African-American individuals.

706 African-Americans with self-reported Hispanic ethnicity (32 additional individuals), and one  
707 additional African-American who was listed as “White, non-Hispanic” in HRS Tracker but as  
708 “African-American” in dbGaP. All individuals were kept in the other cohorts.

709 Optimization was performed for 6 models in each cohort: 2 two-population models, and 4  
710 three-population models.

### 711 **1.12.1 Two-population admixture models**

712 The first two-population model,  $pp$ , consists of a single pulse of discrete admixture between  
713 an African (AFR) and a non-African (NONAFR) population. The second model,  $pp_xp$ , con-  
714 siders a pulse of admixture from each population, followed by a second pulse of admixture  
715 from the NONAFR one. In the model nomenclature, migration events are described by strings  
716 separated by underscores. Each string has one letter per population, with  $p$  indicating a pulse  
717 of migration from the respective source population, and  $x$  indicating no migration from that  
718 population. For example, the model  $pp_xp$  has two events; the first event,  $pp$ , has discrete  
719 contributions from populations 1 and 2, and the second event,  $xp$ , has a contribution only from  
720 population 2.

721 Optimization for each model was performed using a brute force search over a grid of param-  
722 eter points, followed by a local refinement from the maximum likelihood grid-point. Segments  
723 below 11.7 cM (corresponding to the first two bins in our histogram) were not used in the op-  
724 timization process lest their numbers might have been less accurately estimated. However,  
725 model predictions for these segments were reasonably accurate for all models and cohorts. In  
726 the likelihood optimization, the total ancestral proportions for the population were held fixed;  
727 the optimization was performed over the timing of the admixture events and the relative con-  
728 tributions of the distinct pulses of admixture from the same source. The resulting histories and  
729 corresponding likelihoods are shown in Fig. S9.

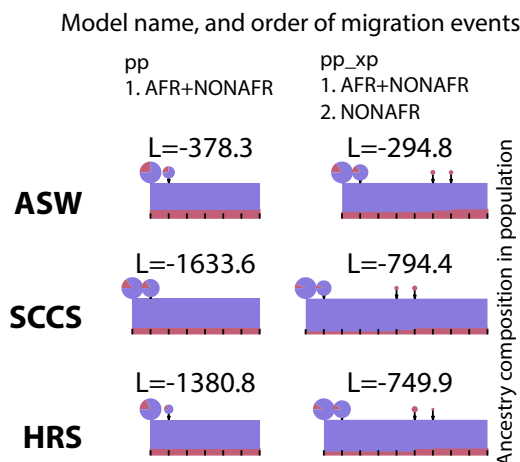

Figure 9: Estimated histories for two-population models, with the corresponding log-likelihoods. African ancestry is displayed in blue, and non-African ancestry in red. Rectangles show the proportion of each ancestry at each generation. Pie charts represent migrations, with the size of the pie representing the amounts of migrants at a given generation, and the sectors represent the proportion of migrants coming from each source population.

730 In addition to the global ancestry proportions, the `pp` model has a single free parameter  
 731 (the timing of admixture), whereas the `pp_xp` model has three (two times of admixture and  
 732 the relative contributions of the first and second non-African admixture). The `pp_xp` model  
 733 outperforms the `pp` model by 631 log-likelihood units in the HRS, and by 839 log-likelihood  
 734 units in the SCCS. We can reject the `pp` model according to either the Akaike information  
 735 criterion or the Bayesian information criterion with  $n = 100$  data points (one point per bin and  
 736 per population).

### 737 1.12.2 Three-population admixture models

738 In the three-population case, the `p_xp_xp_x` model consists of a founding admixture of African  
 739 and Native American migrants, followed by a subsequent pulse of European admixture. The  
 740 `ppp_xp_x` model consists of a founding admixture event involving the three populations, fol-  
 741 lowed by a subsequent pulse of European admixture. The `p_xp_xp_x_xp_x` model has a found-  
 742 ing admixture of African and Native American ancestors, followed by two pulses of European

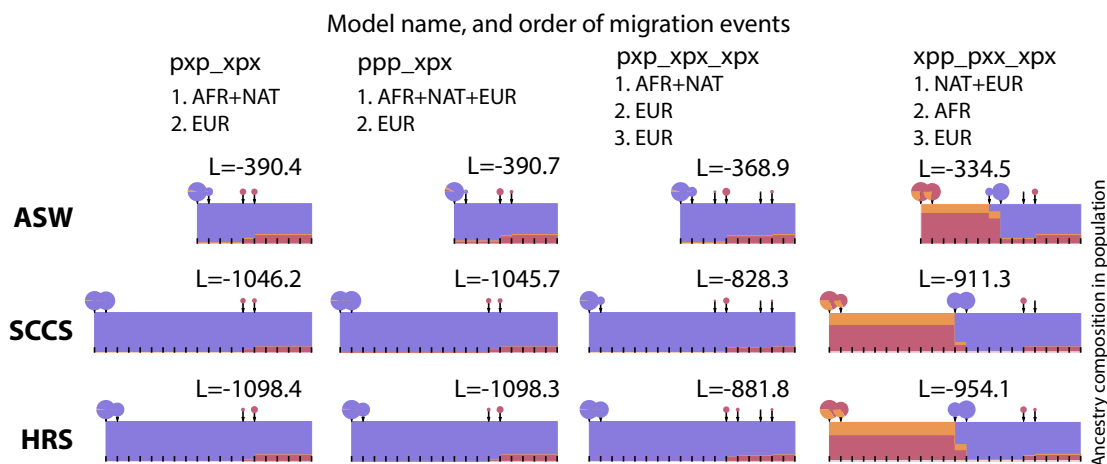

Figure 10: Estimated histories for three-population models, with the corresponding log-likelihoods. African ancestry is displayed in blue, and non-African ancestry in red. Rectangles show the proportion of each ancestry at each generation. Pie charts represent migrations, with the size of the pie representing the amounts of migrants at a given generation, and the sectors represent the proportion of migrants coming from each source population.

743 admixture. Finally, the xpp\_pxx\_xpx model has a founding population of Europeans and  
 744 Native Americans, followed by a pulse of African admixture, followed by a pulse of European  
 745 admixture. These histories are shown in Fig. S10. The best-fit model for the SCCS and HRS is  
 746 the pxx\_xpx\_xpx (see Fig. S11 and S10).

747 In addition to the three global ancestry proportions, model pxx\_xpx, has two free time  
 748 parameters. Model ppp\_xpx has three parameters (two times of admixture and one relative  
 749 contribution between the first and second pulse). Models xpp\_pxx\_xpx and pxx\_xpx\_xpx  
 750 each have four parameters (three times and one relative contribution). For the HRS and SCCS  
 751 datasets, the pxx\_xpx\_xpx model has the best likelihood. Since it outperforms the simpler  
 752 models by 200 log-likelihood units, it is supported by either the Akaike information criterion or  
 753 the Bayesian information criterion with  $n = 150$  data points.

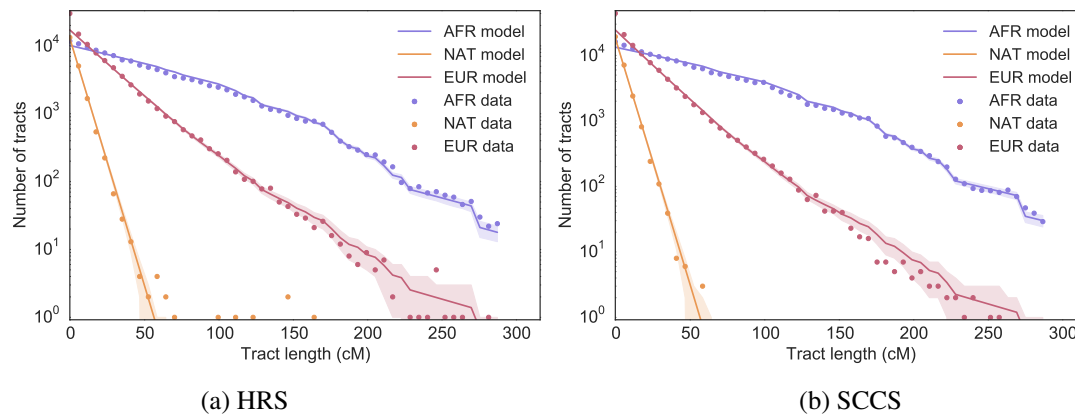

Figure 11: Comparison between observed tract length distribution (dots) and expectation under the best-fitting model (solid lines) for the HRS (a) and SCCS (b). Shaded areas represent one standard deviation departures from model expectations.

### 754 1.12.3 Confidence intervals for timing estimates

755 Confidence intervals for all parameter values were obtained via bootstrap (Table 3). For each  
756 model, we generated 100 bootstrap populations by resampling individuals with replacement.  
757 We performed parameter inference for each bootstrap population, and computed the 95% con-  
758 fidence interval of the resulting distribution of parameters. These confidence intervals account  
759 for the finite number of individuals in the sample. However, they do not account for biases re-  
760 sulting from population structure or model mis-specification. Because of the large sample size,  
761 these biases are likely more important than the uncertainty measured by the bootstrap.

## 762 2 Supplementary text, figures, and tables

### 763 2.1 Additional details on cohorts

### 764 2.2 Number of individuals in each census region or division

765 Movement of HRS individuals between their time of birth and the 2010 sampling year is rep-  
766 resented in Fig. S12. Because of these migrations, the number of individuals in each census  
767 region or division depends on whether we assign each individual to their region/division of

| Model          | Cohort | Parameter          | Value   | Confidence interval |
|----------------|--------|--------------------|---------|---------------------|
| pp             | SCCS   | $t_1$              | 6.3037  | [6.2316, 6.3918]    |
|                | HRS    | $t_1$              | 5.8101  | [5.7224, 5.9004]    |
| pp_xp          | SCCS   | $t_1$              | 9.4954  | [8.5638, 9.8440]    |
|                |        | $t_2$              | 4.4018  | [3.8538, 4.5455]    |
|                |        | $f_2^{\text{EUR}}$ | 0.0945  | [0.0736, 0.1015]    |
|                | HRS    | $t_1$              | 8.3268  | [8.1376, 9.3284]    |
|                |        | $t_2$              | 3.8163  | [3.6980, 4.1718]    |
|                |        | $f_2^{\text{EUR}}$ | 0.0986  | [0.0880, 0.1255]    |
| p_xp_xp_x      | SCCS   | $t_1$              | 18.0755 | [17.6282, 18.5729]  |
|                |        | $t_2$              | 5.5439  | [5.4747, 5.6168]    |
|                | HRS    | $t_1$              | 17.4673 | [16.6013, 18.0893]  |
|                |        | $t_2$              | 5.2085  | [5.1249, 5.2913]    |
| p_xp_xp_x_xp_x | SCCS   | $t_1$              | 17.8069 | [17.3306, 18.2082]  |
|                |        | $t_2$              | 6.1080  | [6.0304, 6.2183]    |
|                |        | $f_2^{\text{EUR}}$ | 0.1233  | [0.1179, 0.1275]    |
|                |        | $t_3$              | 2.2665  | [2.0000, 2.5579]    |
|                | HRS    | $t_1$              | 17.2778 | [16.4673, 17.8263]  |
|                |        | $t_2$              | 5.7287  | [5.6489, 5.9159]    |
|                |        | $f_2^{\text{EUR}}$ | 0.1460  | [0.1363, 0.1505]    |
|                |        | $t_3$              | 2.0000  | [2.0000, 2.6055]    |

Table 3: Confidence intervals for selected models inferred using TRACTS. Here,  $t_i$  refers to the time of the  $i$ th migration event (in generations ago), and  $f_2^{\text{EUR}}$  refers to the fraction of European admixture in the second migration event.



| Cohort | African-American individuals | males / females | Hispanics | locale        |
|--------|------------------------------|-----------------|-----------|---------------|
| HRS    | 1501                         | 531 / 970       | 10        | contiguous US |
| SCCS   | 2128                         | 1131 / 997      | N/A       | southern US   |

Table 4: Characteristics of African-Americans in the HRS and SCCS cohorts.

| census region or division | race             |                   |
|---------------------------|------------------|-------------------|
|                           | African-American | European-American |
| Northeast                 | 171              | 1366              |
| East North Central        | 240              | 1636              |
| West North Central        | 62               | 999               |
| South Atlantic            | 1249             | 2027              |
| East South Central        | 1464             | 562               |
| West South Central        | 420              | 717               |
| West                      | 110              | 1574              |
|                           | 3716             | 8881              |

Table 5: Number of US-born non-Hispanic individuals (HRS, SCCS, and ASW combined) by race and census region or division of residence in 2010 (color coded to match the maps shown in the main text).

768 birth or region/division of residence in 2010.

## 769 **2.3 Detailed geographic location of individuals**

### 770 **2.3.1 HRS**

771 The restricted HRS data contains ZIP codes for each individual, but not states. To calculate  
 772 per-state global ancestry proportions within HRS, we use the following commands in MATHE-  
 773 MATICA (version 10.1.0) to get the list of ZIP codes within each state in the contiguous US. For  
 774 each state, we select HRS individuals whose ZIP codes belong to that state, then estimate the  
 775 mean ancestry proportions for the state using the selected individuals.

```
776 states = CountryData["UnitedStates", "Regions"];
777 states = Delete[states, {Position[states, "Alaska"][[1]], Position[states, "Hawaii"][[1]]};
778 ZIPcodes = GeoEntities[Entity["USState", #], "ZIPCode"][[All, 2]]& /@ states;
```

779 To find the spatial distance between HRS individuals, we use the ZIP Code Tabulation Area

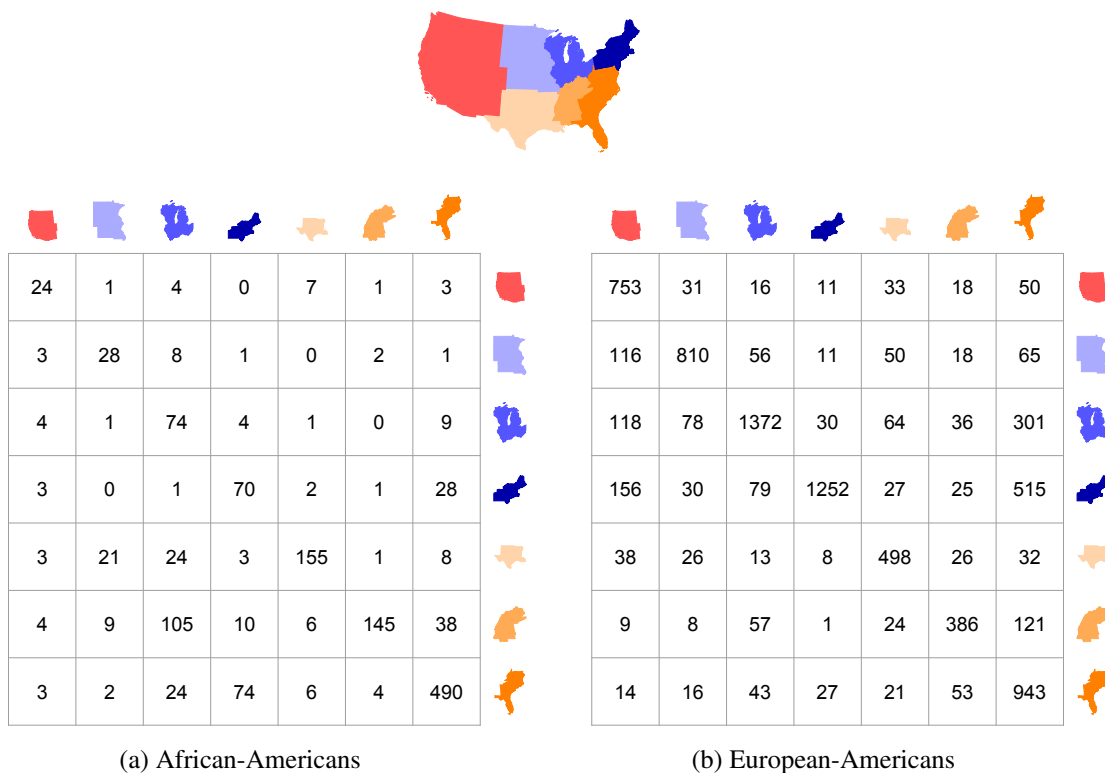

Figure 12: Number of non-Hispanic US-born individuals moving from one region to the other between their time of birth and the 2010 sampling year. Rows represent regions of birth, and columns represent regions of residence in 2010.

780 (ZCTA) database<sup>5</sup> to assign latitude and longitude coordinates to the individuals based on their  
 781 ZIP codes. Each coordinate in the ZCTA database is essentially the latitude and longitude coordinates of the geographic centroid of the corresponding ZIP Code Tabulation Area, as defined  
 782 by the US Census Bureau. We then calculate the geodesic distance between a pair of individuals  
 783 given their assigned geographic coordinates, as an estimate for the actual distance between the  
 784 two individuals.  
 785

<sup>5</sup> From the 2014 US Gazetteer Files by the US Census Bureau <https://www.census.gov/geo/maps-data/data/gazetteer2014.html>

### 786 **2.3.2 SCCS**

787 The data we received from SCCS contains latitude and longitude coordinates of clinics partic-  
788 ipating in the study. To convert the coordinates into specific locations (e.g., ZIP codes, states,  
789 and census regions), we used the Nominatim service from OpenStreetMap<sup>6</sup> to perform reverse  
790 geocoding of the coordinates. Specifically, we used the OpenStreetMap API provided through  
791 MapQuest<sup>7</sup> due to its unlimited usage policy.

## 792 **2.4 Principal component analysis**

793 The results of a PCA analysis on the combined HRS, SCCS, and ASW are shown in Fig. S13.

794 The ASW and SCCS samples cluster with the African-American samples in HRS, as ex-  
795 pected. The vertical axis shows that African ancestry in African-Americans varies continuously  
796 in all cohorts. African-Americans with Hispanic ethnicity are positioned slightly away from  
797 (towards the right of) the cluster of non-Hispanic African-Americans, in the same direction as  
798 other non-African-American Hispanic individuals and along the axis corresponding to Native  
799 American or Asian component. Interestingly, there are individuals in the ASW cohort with  
800 very high levels of Native American or Asian component. Specifically, 1 ASW sample lies al-  
801 most halfway between the European and the Asian cluster, with almost no African component  
802 present, and 4 ASW samples have very high proportions of Native American or Asian com-  
803 ponent. Similarly, within HRS, 5 African-American samples – who have *not* self-identified as  
804 Hispanics – have very high proportions of Native American or Asian component with 4 of them  
805 having extremely low African component. Analogous to these 4 samples, there is one African-  
806 American sample – who has self-identified as Hispanic – who has a similar pattern of African,  
807 European, and Native American or Asian ancestry.

---

<sup>6</sup> Data available under the Open Database Licence; © OpenStreetMap contributors.

<sup>7</sup> Details at <http://open.mapquestapi.com/nominatim/#reverse>

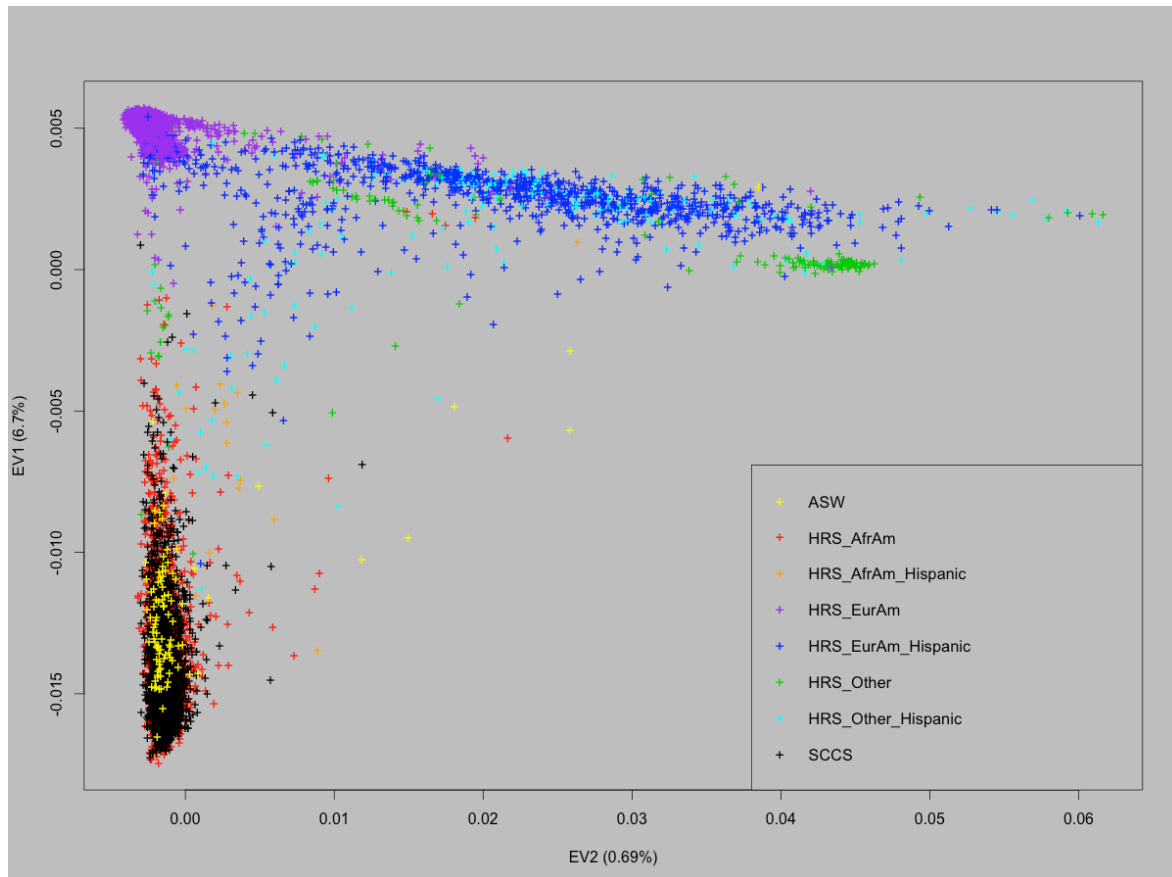

## 808 **2.5 Global ancestry estimates**

809 We used the local ancestry estimates obtained from RFMix to calculate global ancestry propor-  
810 tions for the HRS, SCCS, and ASW cohorts as follows. For each individual, the sum of the  
811 lengths of all tracts of certain continental ancestry (i.e., African, European, or Native Ameri-  
812 can) is calculated across all chromosomes from the output of RFMix and is represented as the  
813 percentage of the total length of the genome (see Fig. S14).

814 For the X chromosome, a supervised run of ADMIXTURE with  $K = 3$  reference pop-  
815 ulations (YRI representing African ancestry, CEU representing European ancestry, and CHS  
816 representing Native American/Asian ancestry) reveals the ancestry pattern shown in Fig. S15.

## 817 **2.6 African-Americans of Hispanic background**

818 We performed a supervised  $K = 4$  run of ADMIXTURE (36) on African-Americans from  
819 HRS, SCCS, and also on the ASW cohort from the 1000 Genomes Project, with the YRI, CHS,  
820 GBR, IBS cohorts from the 1000 Genomes Project used as the reference populations repre-  
821 senting African, Native American/Asian, northern European, and southern European ancestral  
822 populations. Pruning for LD was performed based on the recommendations of the authors of  
823 ADMIXTURE (PLINK arguments `--indep-pairwise 50 10 0.1`). The mean ances-  
824 try proportions for African-Americans in HRS, as estimated by ADMIXTURE, are 81.583%  
825 for African, 17.333% for European (southern and northern combined), and 1.083% for Native  
826 American, in very good agreement with those derived using local ancestry estimates of RFMix  
827 (see main text). In comparison, the ancestry proportions for the ASW cohort are found to be  
828 75.726% for African, 21.881% for European (southern and northern combined), and 2.394% for  
829 Native American.

830 Fig. S16 depicts the ancestry estimates for African-Americans in the ASW, HRS, and SCCS  
831 cohorts respectively, sorted by their Native American proportions (shown in yellow). The top

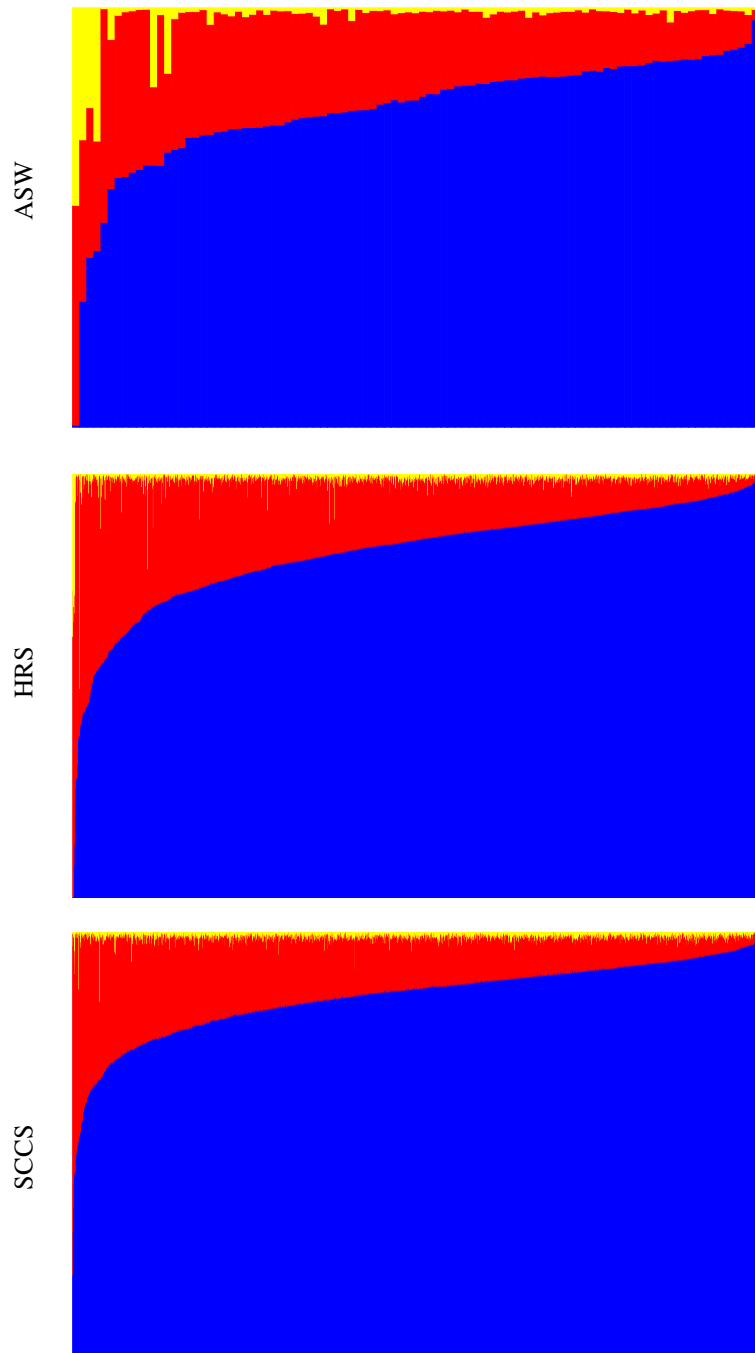

Figure 14: Global ancestry proportions of ASW, African-Americans in HRS, and SCCS individuals, calculated using the RFMix-inferred local ancestry. Blue, red, and yellow respectively denote African, European, and Native American or Asian ancestries. Each vertical line represent one individual, and the height of the color bars denoted the percentage of their respective ancestries in that individual.

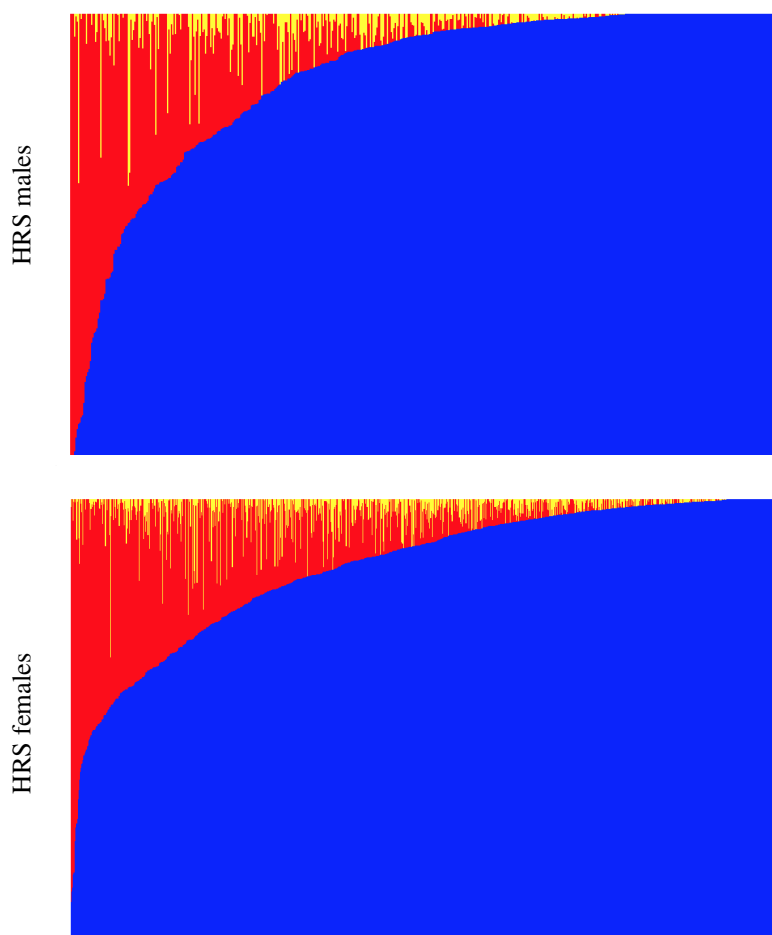

Figure 15: Global ancestry proportions on the X chromosome for HRS African-American males (top) and females (bottom). Each vertical bar represent one individual. Blue, red, and yellow respectively denote African, European, and Native American or Asian ancestries.

832 figure (corresponding to ASW individuals) shows that individuals with higher proportion of  
833 southern European ancestry (shown in green) tend to also have a higher proportion of Native  
834 American ancestry, and this pattern is repeated in the other two plots as well. This is especially  
835 true for HRS African-Americans who have self-identified as Hispanics (marked by the small  
836 black arrows in the middle plot), suggesting a positive correlation between the two ancestry  
837 proportions. Plotting the proportion of southern European ancestry within the total European  
838 ancestry versus the Native American ancestry for HRS African-Americans of Hispanic eth-

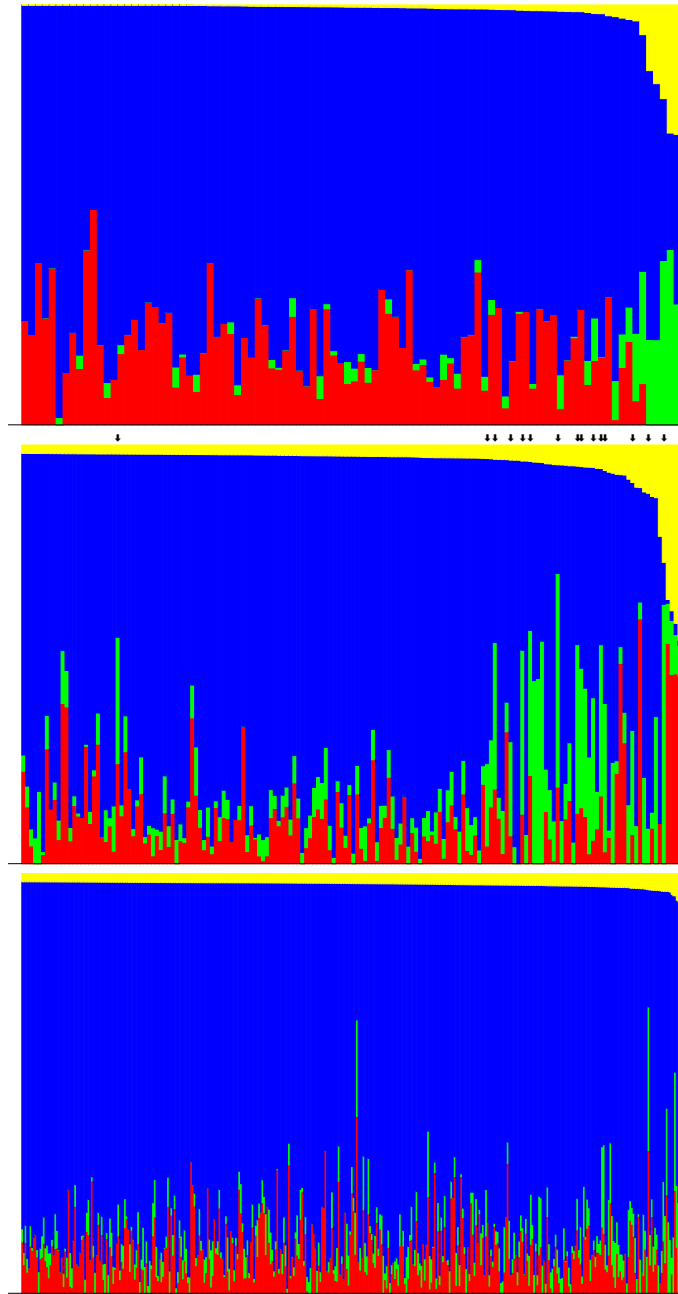

Figure 16: Global ancestry estimates for all ASWs (top) and for individuals with more than 2% Native American ancestry in HRS (middle) and SCCS (bottom). Yellow, blue, red, and green represent, respectively, Native American, African, northern European, and southern European ancestries. Each column represent one individual. Individuals denoted by arrows in the middle plot are self-identified Hispanic African-Americans in HRS.



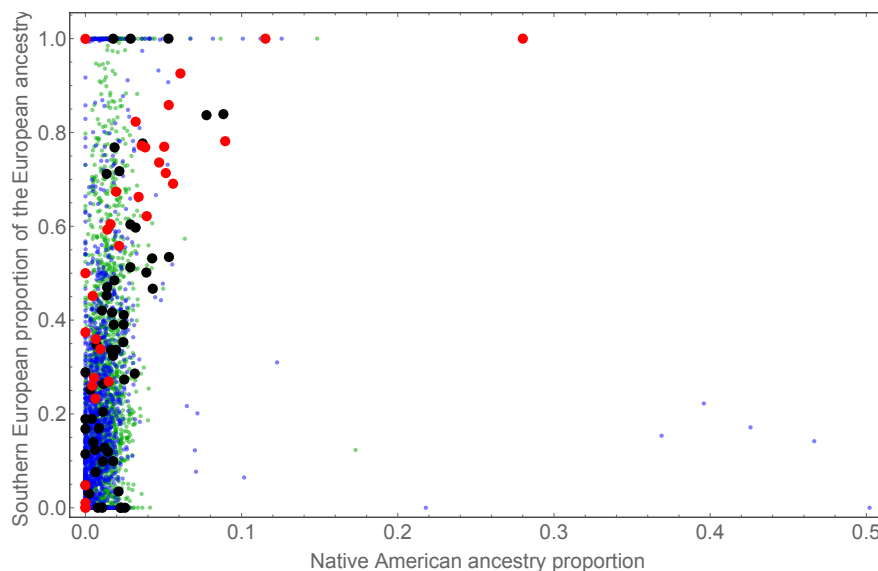

Figure 17: Inferred proportion of southern European ancestry within the total European ancestry versus that of Native American ancestry for African-Americans. Red represents self-identified Hispanic African-Americans in HRS, black represents SCCS African-Americans in Louisiana, and blue and green correspond, respectively, to other HRS and SCCS African-Americans.

839 nicity reveals this correlation more clearly, as depicted by the red dots in Fig. S17. Note the  
840 presence of individuals who have *not* self-identified as Hispanics but have high proportions of  
841 both southern European and Native American ancestries. Moreover, SCCS African-Americans  
842 from Louisiana exhibit a similar pattern, as depicted by the black dots in Fig. S17.

## 843 2.7 Time of admixture by region

844 In Fig. S18, we depict the estimated generation time since admixture in HRS for each census  
845 region, assuming a model with a single pulse of admixture.

## 846 2.8 List of related individuals

847 We have found the pairs of individuals denoted in Table 6 to have kinship coefficients of 0.1  
848 or greater, as estimated by PLINK. To be consistent with the definition from HRS, we have  
849 therefore labeled these pairs as related individuals and have excluded their contributions from

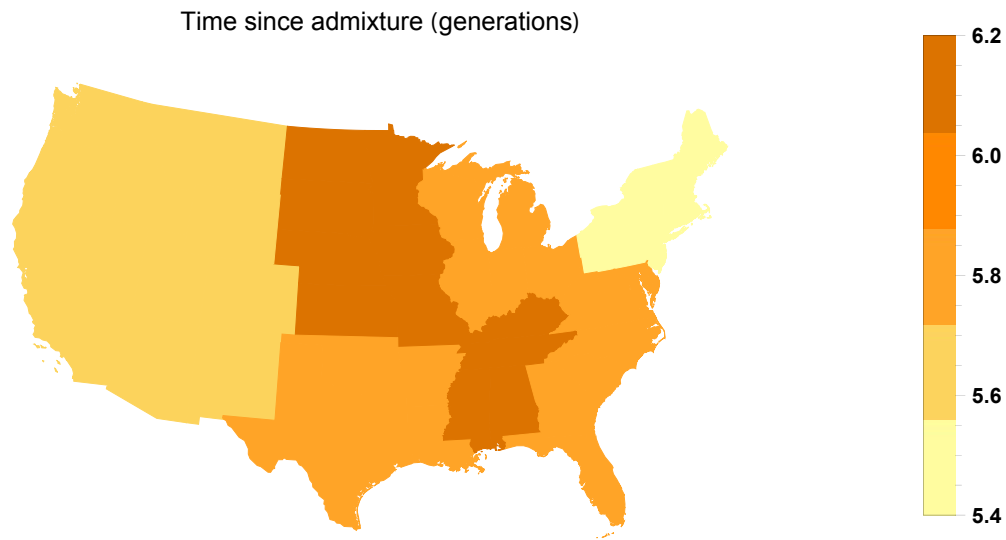

Figure 18: Estimated number of generation since admixture in HRS by region, assuming a single admixture pulse model in each region.

850 our IBD analyses (see Methods).

## 851 **2.9 Distribution of shared IBD tracts**

852 For each individual in the HRS, SCCS, and ASW cohorts, we calculate the number of IBD  
853 segments that it shares with *all other* non-related individuals across all cohorts, using the sparse  
854 relatedness matrix  $\mathcal{N}$  calculated above which contains the total *number* of shared IBD seg-  
855 ments between each pair of individuals. This distribution of IBD sharing for segments in differ-  
856 ent length bins is shown in Fig. S19. For short segments, Europeans show substantially more  
857 IBD compared to African-Americans, and there is more variation in the amount of IBD. The  
858 difference is due to differences in sample size and historical effective population size. The dif-  
859 ference in variance could reflect the greater contributions of more recent migrants in European-  
860 Americans, or more generally the presence of population structure that persisted throughout  
861 US history. By contrast, African-Americans have more long IBD, on average. Since long seg-  
862 ments represent recent history, we attribute this difference between short and long segments

|           |           |         |         |         |         |
|-----------|-----------|---------|---------|---------|---------|
| 161321930 | GWAS_0889 | NA19625 | NA20414 | NA19982 | NA19983 |
| GWAS_0028 | GWAS_2129 | NA19700 | NA19702 | NA19983 | NA19985 |
| GWAS_0223 | GWAS_2277 | NA19701 | NA19702 | NA20126 | NA20128 |
| GWAS_0229 | GWAS_2386 | NA19703 | NA19705 | NA20127 | NA20128 |
| GWAS_0240 | GWAS_1676 | NA19704 | NA19705 | NA20276 | NA20277 |
| GWAS_0252 | GWAS_2389 | NA19707 | NA19708 | NA20278 | NA20279 |
| GWAS_0387 | GWAS_2382 | NA19713 | NA19714 | NA20279 | NA20282 |
| GWAS_0567 | GWAS_2250 | NA19713 | NA19983 | NA20279 | NA20284 |
| GWAS_0773 | GWAS_1975 | NA19713 | NA19985 | NA20282 | NA20284 |
| GWAS_0784 | GWAS_1203 | NA19714 | NA19985 | NA20282 | NA20302 |
| GWAS_0851 | GWAS_1680 | NA19818 | NA19828 | NA20282 | NA20313 |
| GWAS_0894 | GWAS_1595 | NA19819 | NA19828 | NA20287 | NA20288 |
| GWAS_0959 | GWAS_1026 | NA19834 | NA19836 | NA20289 | NA20290 |
| GWAS_1104 | GWAS_1902 | NA19835 | NA19836 | NA20289 | NA20341 |
| GWAS_1137 | GWAS_1765 | NA19900 | NA19902 | NA20290 | NA20341 |
| GWAS_1168 | GWAS_1803 | NA19901 | NA19902 | NA20291 | NA20292 |
| GWAS_1323 | GWAS_1928 | NA19908 | NA19919 | NA20294 | NA20295 |
| GWAS_1375 | GWAS_2257 | NA19909 | NA19919 | NA20296 | NA20297 |
| GWAS_1380 | GWAS_1833 | NA19914 | NA19915 | NA20299 | NA20300 |
| GWAS_1571 | GWAS_1598 | NA19916 | NA19918 | NA20302 | NA20313 |
| GWAS_1596 | GWAS_2171 | NA19917 | NA19918 | NA20314 | NA20316 |
| GWAS_1962 | GWAS_2008 | NA19920 | NA20129 | NA20317 | NA20319 |
| GWAS_2015 | GWAS_2226 | NA19921 | NA20129 | NA20332 | NA20333 |
| NA20332   | NA20343   | NA20342 | NA20343 | NA20357 | NA20358 |
| NA20334   | NA20335   | NA20344 | NA20345 | NA20359 | NA20360 |
| NA20334   | NA20336   | NA20344 | NA20350 | NA20359 | NA20363 |
| NA20334   | NA20337   | NA20346 | NA20347 | NA20363 | NA20364 |
| NA20335   | NA20336   | NA20347 | NA20363 |         |         |
| NA20336   | NA20337   | NA20356 | NA20358 |         |         |

Table 6: Related pairs of individuals in the cohorts with estimated kinship coefficient of 0.1 or larger. For relateds within HRS, we used the list provided by the Health and Retirement Study.

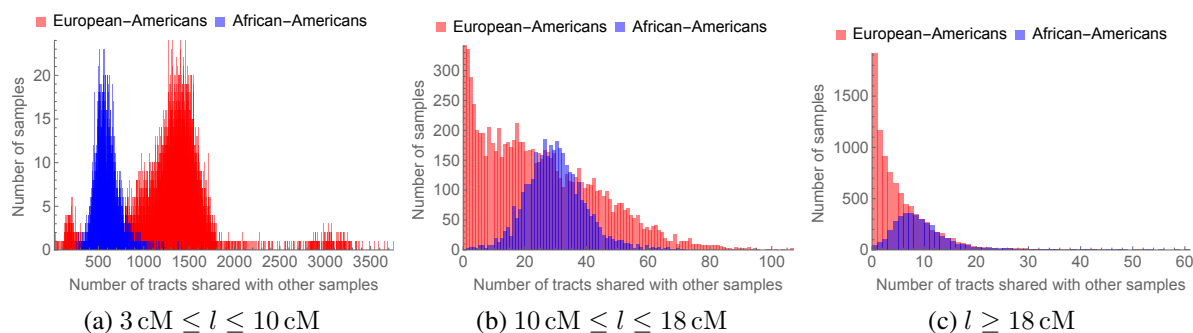

Figure 19: Distribution of IBD sharing for African-American (blue) and European-American (red) individuals using IBD tracts belonging to different length bins.

863 to the a much greater reduction in effective population size in African-Americans compared to  
864 European-Americans since the arrival into the Americas.

865 IBD sharing for European-Americans tends to be mostly via shorter (and, therefore, older)  
866 IBD segments compared to that for African-Americans. Hence, for bins containing longer IBD  
867 segments, the peak corresponding to European-American IBD sharing moves to the left faster  
868 compared to the respective peak for African-Americans.

## 869 2.10 Regional IBD relatedness and sampling locations

870 Using the individuals' region of residence in 2010 as their location, we find the relatedness pat-  
871 tern shown in Fig. S20 between census regions for African-Americans and European-Americans.  
872 On the other hand, using the individuals' region of birth as their location instead of their 2010  
873 region of residence, we find the relatedness pattern shown in Fig. S21 between census regions  
874 for African-Americans and European-Americans.

875 The differences between Fig. S21 and Fig. S20 are due to the following factors: If we use  
876 the 2010 region of residence as opposed to the region of birth as the individuals' locations, the  
877 number of individuals in the northern and western census regions increases due to the migrations  
878 from the South. This is the reason that more North-to-West connections are shown in Fig. S20

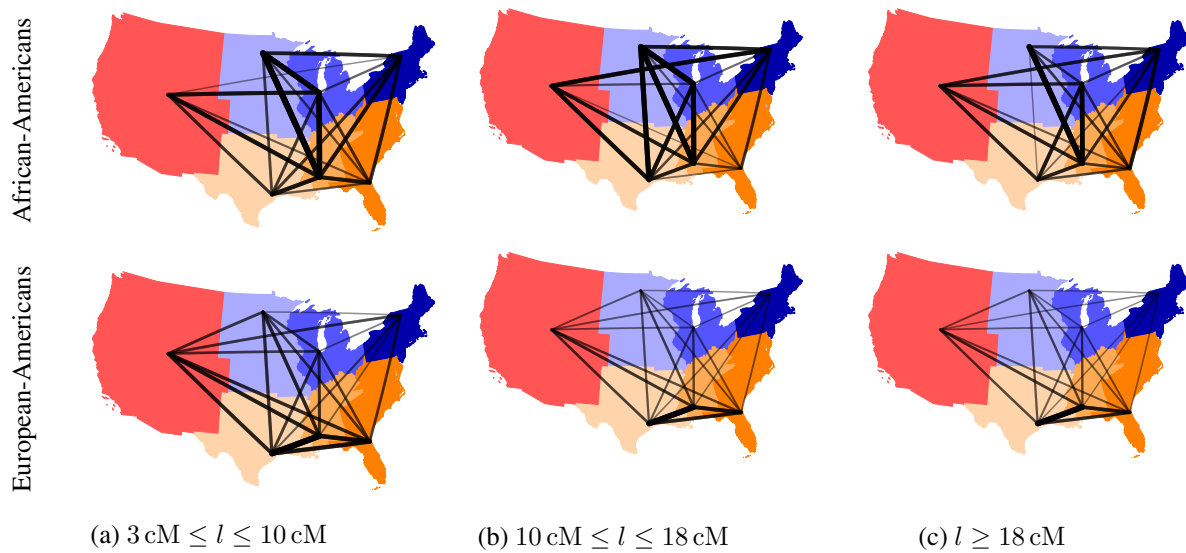

Figure 20: IBD relatedness among African-Americans (top row) and among European-Americans (bottom row) across the US census regions (using 2010 region of residence). In each subfigure, the thickness and opacity of the line connecting any two regions show the strength of relatedness between those regions. Note that scaling of lines is not equal across different subfigures, and relatedness between regions with fewer than 10,000 possible pairs of individuals is not shown (see Methods for details).

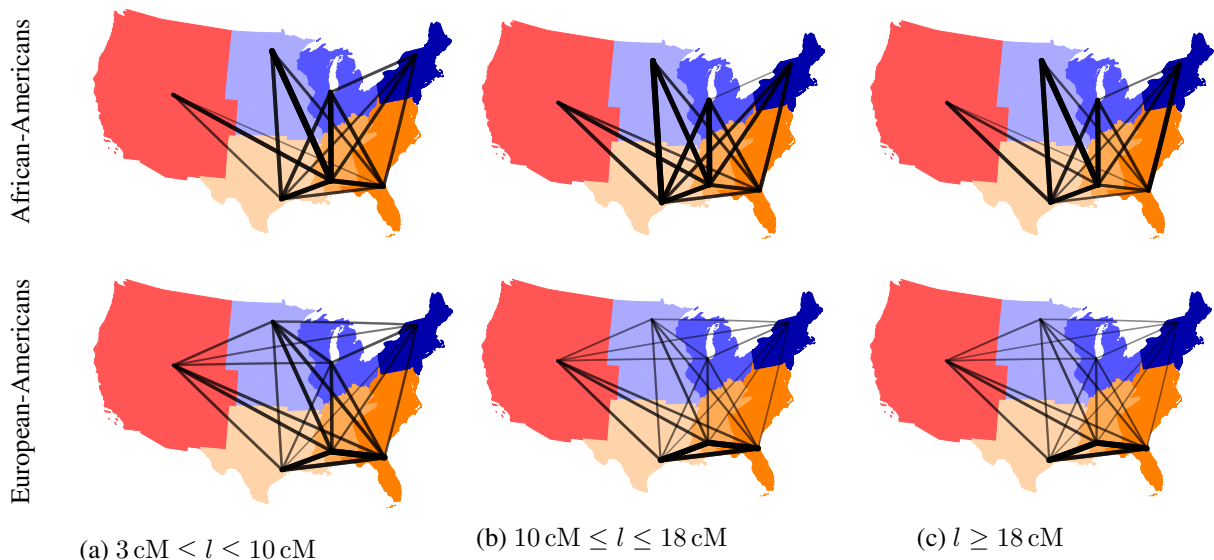

Figure 21: IBD relatedness among African-Americans (top row) and among European-Americans (bottom row) across the US census regions (using the regions of birth). In each subfigure, the thickness and opacity of the line connecting any two regions show the strength of relatedness between those regions. Note that scaling of lines is not equal across different subfigures, and relatedness between regions with fewer than 10,000 possible pairs of individuals is not shown (see Methods for details).

879 than in Fig. S21, considering our criterion of a minimum of 10,000 potential IBD pairs for  
880 visualization of the relatedness between two regions. Moreover, we also see that the connection  
881 between West South Central and West North Central is weaker Fig. S20 than in Fig. S21. This  
882 is mainly due to 21 African-American individuals in HRS who were born in West South Central  
883 and who have large IBD with other individuals who were born in northern regions, especially  
884 those in West North Central. These individuals later moved to West North Central and, thus, are  
885 sampled in the latter region in 2010 (see Fig. S12a). The observed depletion of the IBD signal  
886 connecting the aforementioned two regions (which is explained by these migrations) is, thus, a  
887 sampling effect.

888 Fig. S22 shows details of the relatedness patterns among African-Americans across US cen-  
889 sus regions. The grayscale plots in the top row show the average pairwise IBD length shared

890 between census regions, calculated using all IBD segments satisfying the length criteria shown  
891 below each column. Actual values are shown in the middle row, whereas plots in the bottom  
892 row show the total number of IBD segments shared between the US census regions. Relatedness  
893 between European-Americans across US census regions is similarly displayed in Fig. S23.  
894 Relatedness between African-Americans and European-Americans is shown in Fig. S24.

## 895 **2.11 Census-based regional relatedness**

896 Census-based relatedness between the US regions, estimated via the  $\bar{P}$  (directional) and  $I$  (non-  
897 directional) metrics (as defined in the Methods), are shown in Fig. S25 for African-Americans  
898 and European-Americans.

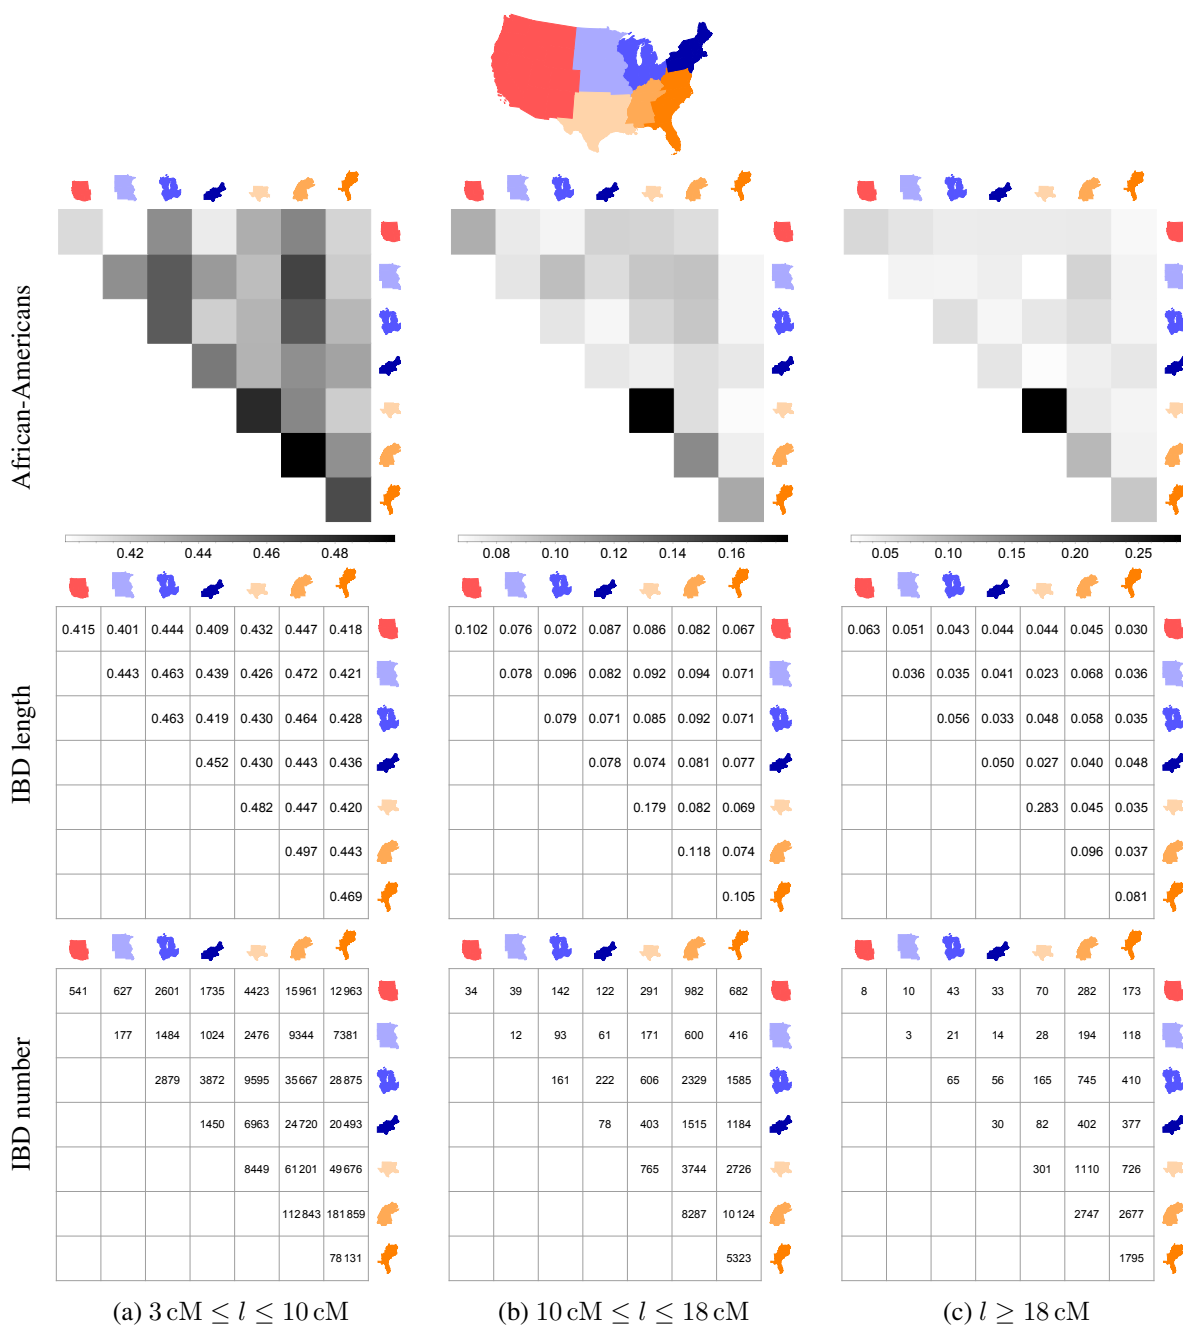

Figure 22: Relatedness between African-Americans across US census regions based on the average total length of shared IDB segments of length in the specified ranges (using region of residence in 2010). The values shown in the second row are converted to grayscale in the top row to aid visualization, with the scales presented underneath each figure. Since the matrices are symmetric, only the upper-triangular parts are shown.



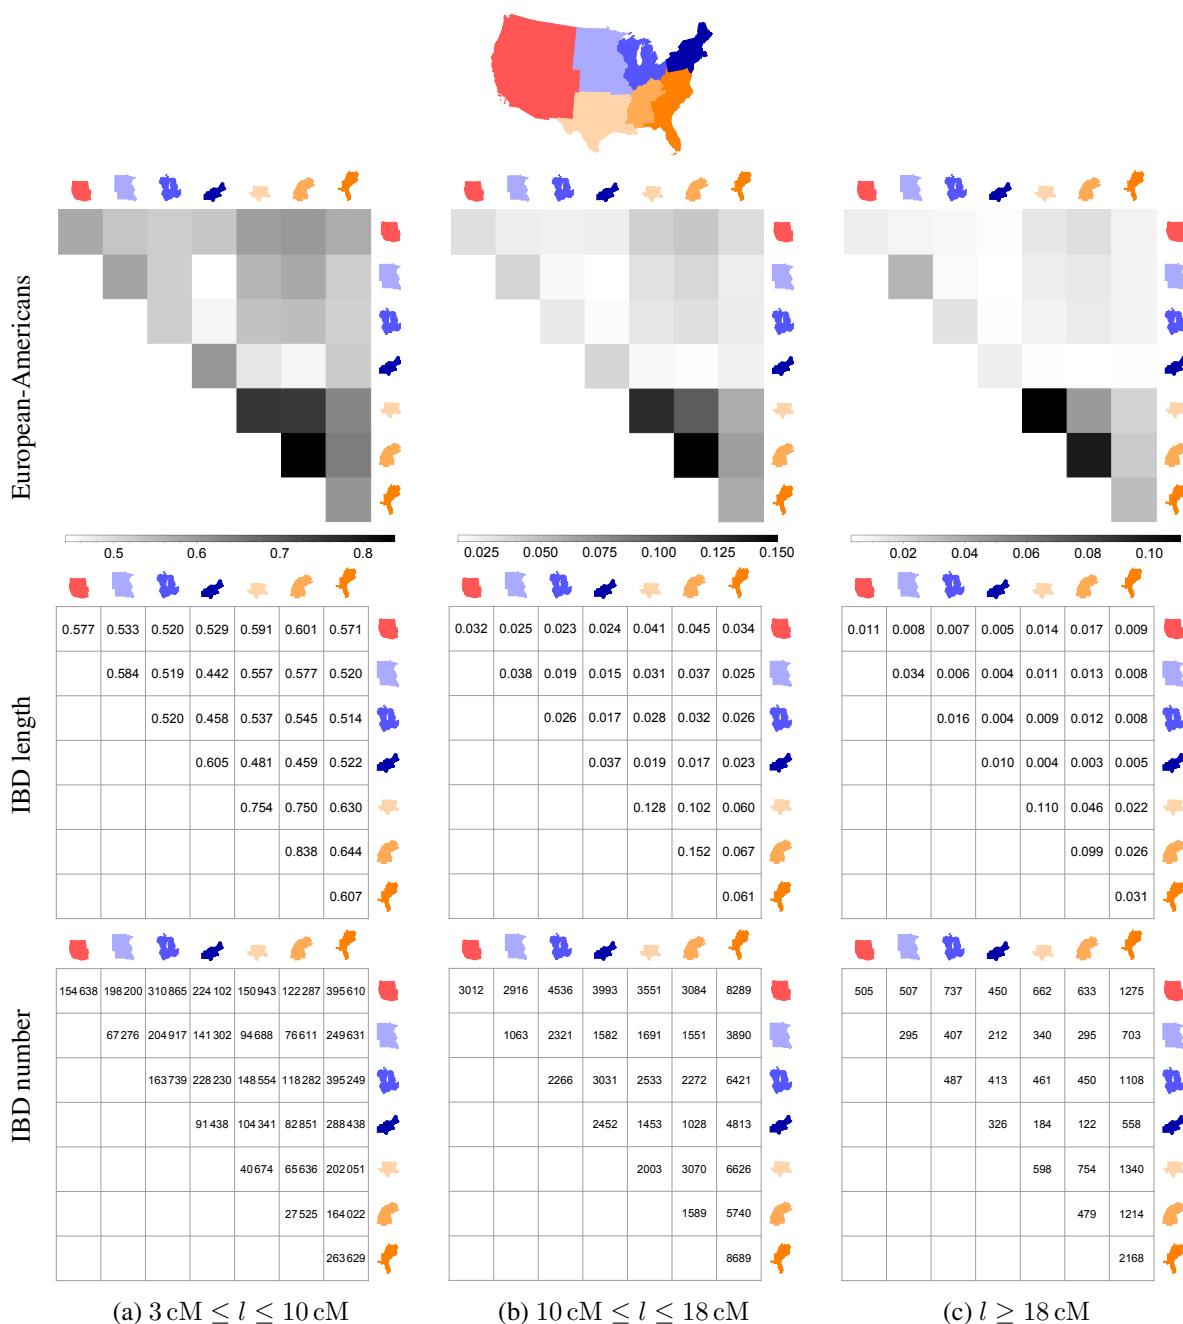

Figure 23: Relatedness between European-Americans across US census regions based on the average total length of shared IDB segments of length in the specified ranges (using region of residence in 2010). The values shown in the second row are converted to grayscale in the top row to aid visualization, with the scales presented underneath each figure. Since the matrices are symmetric, only the upper-triangular parts are shown.

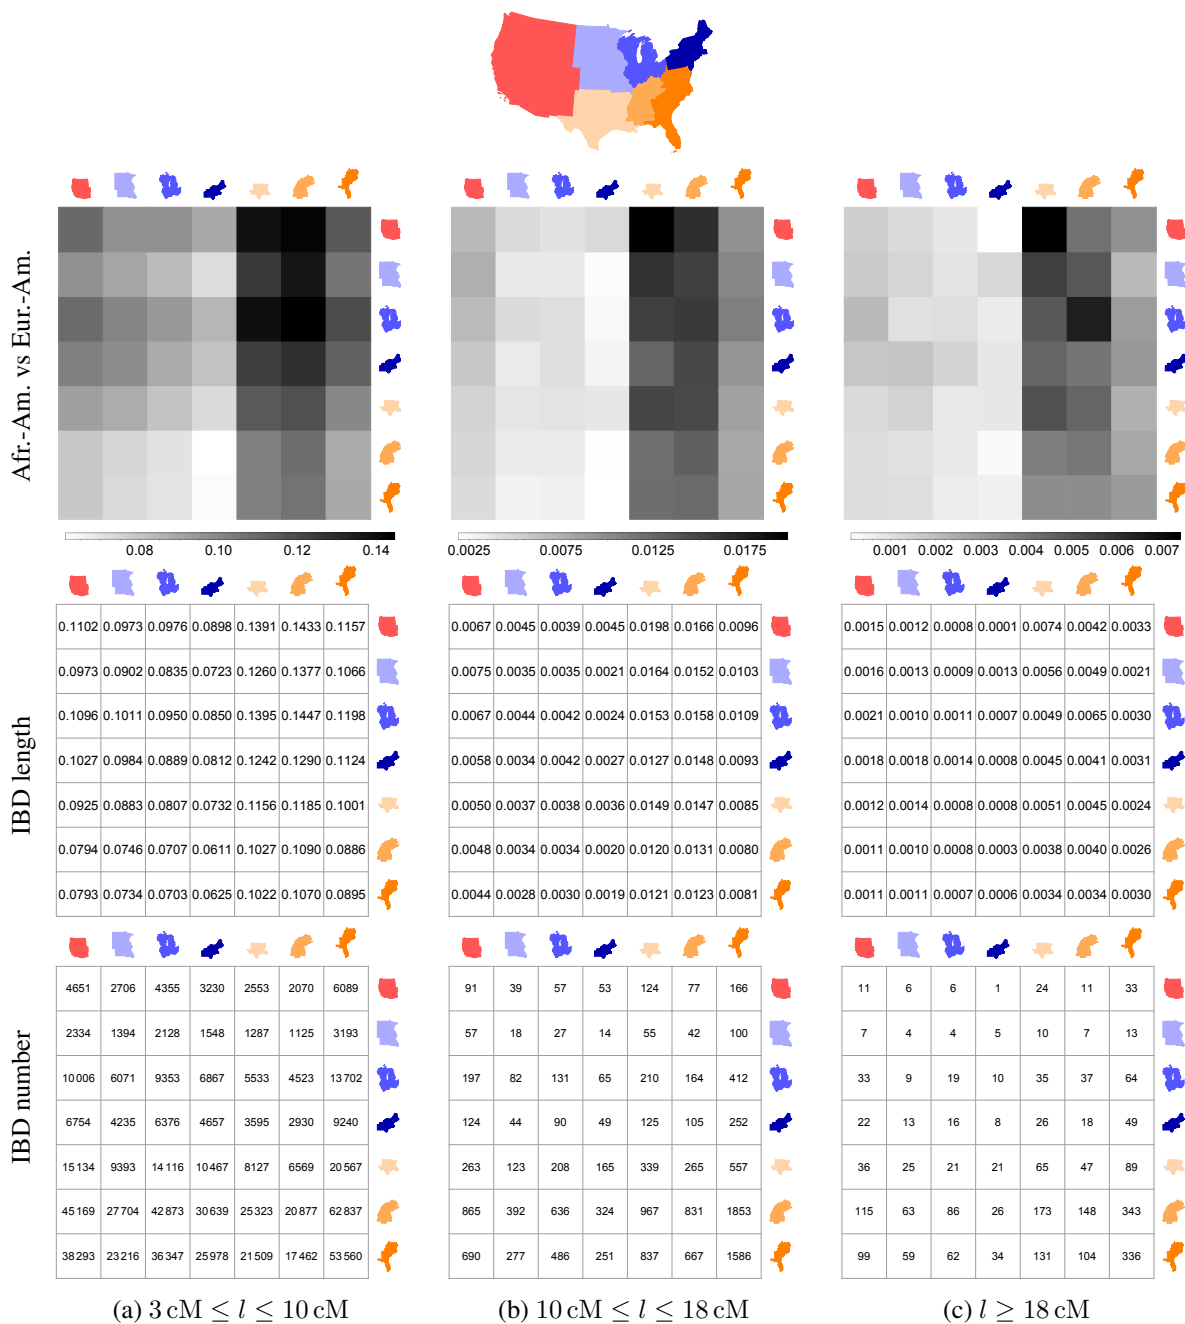

Figure 24: Relatedness between African-Americans and European-Americans across US census regions based on the average total length (top and middle rows) and number (bottom row) for IDB segments of length in the specified ranges (using region of residence in 2010). The values shown in the second row are converted to grayscale in the top row to aid visualization, with the scales presented underneath each figure. The columns in each figure represent European-Americans, and the rows represent African-Americans.

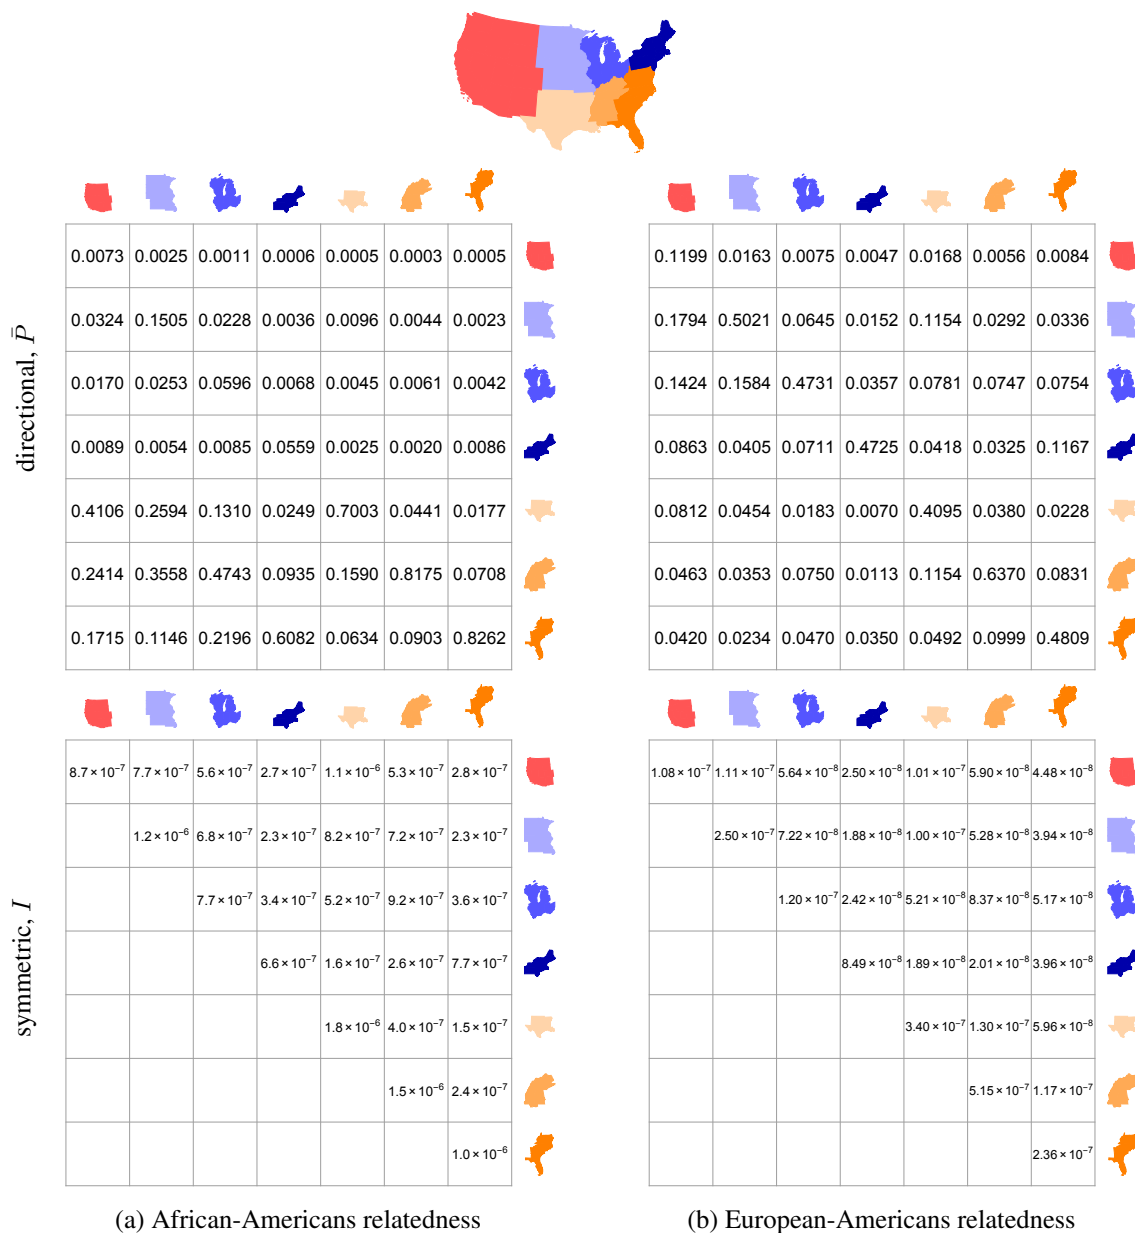

Figure 25: Census-based predicted relatedness between (a) African-Americans and (b) European-Americans across the US census regions. The top row shows the values for the directional metric  $\bar{P}$ , whereas the bottom row shows those for the symmetric one  $I$ . In the top figures (read column-wise), each column shows for its respective census region the proportion of ancestral population which originated from other census regions.
